# Supplementary material
Source: PubMed Central journal article supplement (PMC2864289)
Supplement: djq057_4.pdf [file djq057_4.pdf]

Supplementary Table 2. The 10,621 single-nucleotide polymorphisms (SNPs) evaluated for association with all-cause mortality in the Studies of Epidemiology and Risk factors in Cancer Heredity (SEARCH) dataset

| db SNP number |
|---------------|---------------|---------------|---------------|---------------|---------------|---------------|
| rs1000031     | rs12427923    | rs17008498    | rs2047169     | rs35255       | rs596868      | rs7572174     |
| rs10002001    | rs12428636    | rs17009372    | rs2047223     | rs352816      | rs5969241     | rs7572397     |
| rs10004542    | rs12429206    | rs170098      | rs2047616     | rs353200      | rs5970294     | rs7573532     |
| rs10004565    | rs1242935     | rs17010110    | rs2048763     | rs353615      | rs597225      | rs7574501     |
| rs1000507     | rs12430037    | rs17011280    | rs2049118     | rs353721      | rs5972684     | rs7575062     |
| rs1000515     | rs12430210    | rs17011367    | rs2049567     | rs354000      | rs5972739     | rs7576057     |
| rs1000530     | rs12433985    | rs17011744    | rs2049621     | rs35540       | rs5974314     | rs7576479     |
| rs1000849     | rs12434454    | rs17011874    | rs2049823     | rs355680      | rs5975878     | rs7579804     |
| rs10010241    | rs1243517     | rs17012263    | rs2049956     | rs355837      | rs5977273     | rs7580449     |
| rs10010290    | rs12435587    | rs17014016    | rs2050107     | rs356260      | rs5978060     | rs7581465     |
| rs10011243    | rs12436620    | rs17015010    | rs2050111     | rs35684       | rs5979380     | rs7583800     |
| rs10011757    | rs12436695    | rs17015335    | rs205013      | rs359316      | rs5979471     | rs7584345     |
| rs10012553    | rs12437038    | rs17015501    | rs2050558     | rs3596        | rs5979699     | rs7586918     |
| rs10013576    | rs12437836    | rs17016000    | rs2050695     | rs360017      | rs5980246     | rs7587393     |
| rs10015937    | rs12438930    | rs17016806    | rs2051569     | rs361142      | rs5981225     | rs7587910     |
| rs10016862    | rs12440440    | rs17017854    | rs205373      | rs361169      | rs598651      | rs758958      |
| rs10017772    | rs12443621    | rs17018727    | rs2054539     | rs36143       | rs5986678     | rs758959      |
| rs10018359    | rs12444143    | rs17018777    | rs2054622     | rs361971      | rs5990013     | rs7589906     |
| rs1001852     | rs12444199    | rs17020046    | rs2054996     | rs362525      | rs5991477     | rs7590589     |
| rs1001882     | rs12445643    | rs17020636    | rs2055011     | rs365653      | rs5994231     | rs7591287     |
| rs1001903     | rs12446957    | rs17020719    | rs2055160     | rs36956       | rs5994673     | rs7592038     |
| rs10019416    | rs12447611    | rs17020733    | rs2055177     | rs369908      | rs5994737     | rs7592334     |
| rs10020385    | rs12449988    | rs17021740    | rs2055318     | rs370325      | rs5996224     | rs7592517     |
| rs1002420     | rs12450574    | rs17021931    | rs2055939     | rs370825      | rs5996817     | rs7593793     |
| rs10024205    | rs12450620    | rs17024311    | rs2056277     | rs3729508     | rs5996929     | rs759498      |
| rs1002428     | rs12450630    | rs17024618    | rs2057081     | rs3729558     | rs5997305     | rs7595347     |
| rs10027083    | rs12450805    | rs17025018    | rs2057174     | rs3731566     | rs5997830     | rs7595568     |
| rs10027109    | rs12450955    | rs17025169    | rs205774      | rs3731702     | rs5998500     | rs7596419     |
| rs10027331    | rs12451083    | rs17025886    | rs2058796     | rs3735615     | rs5998822     | rs7597291     |
| rs10027471    | rs12451302    | rs17026081    | rs2059552     | rs3736207     | rs6000130     | rs7598168     |
| rs10030740    | rs12452390    | rs17026574    | rs2060547     | rs3736430     | rs6000690     | rs7599262     |
| rs10033814    | rs12452497    | rs17027663    | rs2060548     | rs3736939     | rs6000819     | rs7601607     |
| rs10036059    | rs12456284    | rs17029069    | rs2061717     | rs373777      | rs6002745     | rs760163      |
| rs1003620     | rs12456647    | rs17029322    | rs2061908     | rs3738097     | rs600374      | rs7602117     |
| rs10037973    | rs12456691    | rs17029874    | rs2062014     | rs3738099     | rs600419      | rs7602190     |
| rs10039523    | rs12457927    | rs17030082    | rs206231      | rs3738570     | rs6005434     | rs760250      |
| rs1003968     | rs12458199    | rs17030257    | rs2062475     | rs3739262     | rs6005863     | rs7602866     |
| rs1004004     | rs12458657    | rs17032996    | rs206327      | rs3739465     | rs6006891     | rs7603002     |
| rs10041224    | rs12458781    | rs17033285    | rs2063390     | rs3740892     | rs6008290     | rs7603052     |
| rs10042728    | rs12458998    | rs17033390    | rs2063559     | rs3740996     | rs6008817     | rs7603219     |
| rs10043094    | rs12462194    | rs17034027    | rs2063742     | rs3741099     | rs6009127     | rs7603249     |
| rs1004445     | rs12462690    | rs17035137    | rs2063860     | rs3741411     | rs6009256     | rs7603685     |
| rs10046799    | rs12465398    | rs17035323    | rs206499      | rs3741526     | rs6012184     | rs7604588     |
| rs10047734    | rs12465952    | rs17035590    | rs2065333     | rs374204      | rs6014546     | rs760530      |
| rs10048286    | rs12466226    | rs17036172    | rs2067928     | rs3743102     | rs601466      | rs7605401     |
| rs10049501    | rs1246725     | rs17039290    | rs2068961     | rs3743299     | rs6015458     | rs760544      |
| rs10049947    | rs12467812    | rs17039361    | rs2069120     | rs3744786     | rs6017022     | rs7605835     |
| rs10052133    | rs12468107    | rs17039417    | rs2069145     | rs3744877     | rs6018600     | rs7606168     |
| rs10052220    | rs12468177    | rs17039554    | rs2069538     | rs3745306     | rs601962      | rs7607746     |
| rs10053466    | rs12468557    | rs17040040    | rs2070715     | rs3746016     | rs6021317     | rs7608224     |
| rs10054106    | rs12469678    | rs17040389    | rs2070856     | rs3746209     | rs6021325     | rs7608272     |
| rs1005448     | rs12470058    | rs170412      | rs2070971     | rs3747129     | rs6022041     | rs7608525     |
| rs10055400    | rs12471413    | rs17041826    | rs2071511     | rs3747411     | rs6022360     | rs7609608     |
| rs10055729    | rs12471468    | rs17043025    | rs2071556     | rs3748569     | rs6022643     | rs7611342     |
| rs10057481    | rs12471751    | rs17043976    | rs2071972     | rs3750685     | rs6022716     | rs7611423     |
| rs1005766     | rs12472229    | rs17044090    | rs2072493     | rs3750817     | rs6023311     | rs7612076     |
| rs10059732    | rs12472646    | rs17044175    | rs2072722     | rs3750903     | rs6023511     | rs7612288     |
| rs10061553    | rs12472999    | rs17045176    | rs2073008     | rs3751263     | rs6024728     | rs7612632     |

|            |            |            |           |           |           |           |
|------------|------------|------------|-----------|-----------|-----------|-----------|
| rs10063054 | rs12474491 | rs17045420 | rs2073307 | rs3751955 | rs6026414 | rs7613340 |
| rs1006333  | rs12474605 | rs17046990 | rs2073324 | rs3752523 | rs6028936 | rs7613442 |
| rs1006436  | rs1247499  | rs17047056 | rs2073325 | rs3752728 | rs6034187 | rs7613624 |
| rs1006542  | rs12475566 | rs17047063 | rs2075122 | rs37545   | rs6034624 | rs7614673 |
| rs10068004 | rs12477310 | rs17047214 | rs2075276 | rs3755625 | rs6036759 | rs7615444 |
| rs10069724 | rs12477552 | rs17047773 | rs2076196 | rs3756416 | rs603888  | rs7617462 |
| rs1007404  | rs12479719 | rs17047804 | rs2076398 | rs3756724 | rs6039758 | rs7617735 |
| rs10075572 | rs12480388 | rs17047996 | rs2077460 | rs3757574 | rs6040232 | rs761824  |
| rs10075861 | rs12481277 | rs17048336 | rs2077740 | rs3758559 | rs6040291 | rs7618902 |
| rs10078182 | rs12487226 | rs17049688 | rs2080787 | rs375886  | rs6042018 | rs761944  |
| rs10078397 | rs12487617 | rs17050001 | rs2080976 | rs3758873 | rs6044296 | rs7621032 |
| rs10079980 | rs12490015 | rs17051542 | rs2082106 | rs3759334 | rs604589  | rs762307  |
| rs10080639 | rs12490618 | rs17052559 | rs2082495 | rs3760386 | rs604612  | rs762407  |
| rs1008328  | rs12492242 | rs17052966 | rs2083407 | rs3760776 | rs6047472 | rs7624098 |
| rs10084238 | rs12492411 | rs17053861 | rs208346  | rs3761081 | rs6048545 | rs7624356 |
| rs10086475 | rs12493849 | rs17054120 | rs2084697 | rs3761997 | rs6049484 | rs762507  |
| rs10087659 | rs12494049 | rs17054251 | rs208507  | rs3762799 | rs6050341 | rs7626182 |
| rs10088075 | rs12497778 | rs17054339 | rs208543  | rs3764633 | rs6050372 | rs7627231 |
| rs10089407 | rs1249780  | rs17055038 | rs2086329 | rs3766878 | rs605093  | rs7627379 |
| rs10091197 | rs12498329 | rs17058743 | rs2088236 | rs3766926 | rs6054431 | rs7627629 |
| rs10092157 | rs1249865  | rs17058987 | rs2088712 | rs37676   | rs6055483 | rs7628446 |
| rs10092924 | rs12499107 | rs17059454 | rs2089343 | rs3769619 | rs6056049 | rs762864  |
| rs10093885 | rs12499246 | rs17059587 | rs2091143 | rs3770261 | rs6056616 | rs7629693 |
| rs1009392  | rs12499711 | rs17059805 | rs2091861 | rs3772335 | rs6056867 | rs7630725 |
| rs10094283 | rs12499919 | rs17060351 | rs209231  | rs3772852 | rs6057649 | rs763073  |
| rs10096750 | rs1250073  | rs17060356 | rs2094290 | rs3775194 | rs6058227 | rs7631859 |
| rs1009714  | rs1250075  | rs17061953 | rs2094394 | rs3776168 | rs6061000 | rs763341  |
| rs1009831  | rs12501994 | rs170623   | rs209440  | rs3778995 | rs6062036 | rs7633887 |
| rs10100803 | rs12506649 | rs17062621 | rs209458  | rs377963  | rs6062140 | rs7635788 |
| rs10101362 | rs12508467 | rs17062695 | rs2095369 | rs377976  | rs6064324 | rs7636402 |
| rs1010211  | rs12510203 | rs17064803 | rs209773  | rs3781273 | rs6064367 | rs7636734 |
| rs10102302 | rs12511233 | rs17065626 | rs2097852 | rs3782471 | rs6067892 | rs7638112 |
| rs10102593 | rs12511735 | rs17067690 | rs2097868 | rs3782881 | rs6068526 | rs7638130 |
| rs10103318 | rs12515768 | rs17067831 | rs2098102 | rs3783035 | rs6069624 | rs7638306 |
| rs10104028 | rs12520462 | rs1706803  | rs2100641 | rs3783076 | rs6069921 | rs7639932 |
| rs1010570  | rs12521016 | rs17068055 | rs2101513 | rs3784187 | rs6070848 | rs764000  |
| rs1010652  | rs1252126  | rs17069021 | rs2102954 | rs3784377 | rs6076199 | rs7640580 |
| rs10107799 | rs12522384 | rs17069825 | rs210327  | rs3785194 | rs607953  | rs7640928 |
| rs10109541 | rs12522996 | rs17072446 | rs210394  | rs3786454 | rs6079581 | rs764133  |
| rs10110673 | rs12525557 | rs17072805 | rs2105076 | rs3787138 | rs6080727 | rs764221  |
| rs10110717 | rs12525605 | rs17073267 | rs2105309 | rs3787195 | rs6081637 | rs7642296 |
| rs10112630 | rs12525992 | rs17073435 | rs210697  | rs3788976 | rs608196  | rs7643025 |
| rs10112708 | rs12526782 | rs17073586 | rs2107121 | rs379060  | rs6083569 | rs7645596 |
| rs1011348  | rs12528341 | rs17074095 | rs2107425 | rs3792311 | rs6086551 | rs7645905 |
| rs10117602 | rs12528813 | rs1707418  | rs2107459 | rs3792325 | rs6088727 | rs764606  |
| rs1011892  | rs12533584 | rs17074757 | rs2107460 | rs3792697 | rs6092297 | rs7646071 |
| rs10119380 | rs1253423  | rs17074894 | rs2108012 | rs3793532 | rs6093322 | rs764650  |
| rs10119492 | rs12534434 | rs17075290 | rs2109780 | rs3794505 | rs6093732 | rs7648874 |
| rs10120598 | rs12535472 | rs17075694 | rs2110470 | rs3794668 | rs609564  | rs7650014 |
| rs10121312 | rs1253669  | rs17077608 | rs2111264 | rs3794684 | rs6096473 | rs7650257 |
| rs1012300  | rs1253676  | rs17078062 | rs2111332 | rs3794763 | rs6102594 | rs7652129 |
| rs10123526 | rs12537553 | rs17078346 | rs2113810 | rs3795677 | rs6106289 | rs7652651 |
| rs10125071 | rs12539669 | rs17078353 | rs2113945 | rs3795736 | rs6109791 | rs7653410 |
| rs10127045 | rs12539888 | rs17078686 | rs2114194 | rs3795753 | rs611061  | rs7654771 |
| rs10128333 | rs12539987 | rs17078696 | rs2115420 | rs3795823 | rs611315  | rs7657612 |
| rs10128342 | rs12540802 | rs17079099 | rs2117737 | rs3796131 | rs6113520 | rs7657850 |
| rs10129270 | rs12540876 | rs17080528 | rs211803  | rs3796734 | rs6113954 | rs7658148 |
| rs1012968  | rs12541553 | rs17081387 | rs2118908 | rs3797177 | rs6115224 | rs7658349 |
| rs1013024  | rs12542005 | rs17081524 | rs2119342 | rs3797938 | rs611761  | rs7658779 |
| rs1013170  | rs12543918 | rs17081816 | rs2119623 | rs3799260 | rs6123602 | rs7658791 |
| rs10131882 | rs12544170 | rs17081939 | rs2123330 | rs3799525 | rs6123609 | rs7658972 |
| rs10132545 | rs12544197 | rs17083011 | rs2125878 | rs3800424 | rs6123762 | rs7659    |
| rs10132606 | rs12544313 | rs17084250 | rs212772  | rs3800688 | rs6123765 | rs7659335 |

|            |            |            |           |           |           |           |
|------------|------------|------------|-----------|-----------|-----------|-----------|
| rs10132988 | rs12544761 | rs17085333 | rs212968  | rs3800710 | rs6124125 | rs7659614 |
| rs10133192 | rs12546434 | rs17085593 | rs2129895 | rs3801272 | rs6124206 | rs7661394 |
| rs10134355 | rs12547041 | rs17085679 | rs213059  | rs3801303 | rs6126886 | rs7662505 |
| rs10136321 | rs12550240 | rs17085804 | rs2130882 | rs3801839 | rs6126964 | rs7663354 |
| rs1013856  | rs12550268 | rs17086050 | rs213137  | rs380256  | rs6126986 | rs7663785 |
| rs10139982 | rs12550655 | rs17086809 | rs2132797 | rs3803033 | rs6127771 | rs7664025 |
| rs10141027 | rs1255411  | rs17087621 | rs213328  | rs3803440 | rs6129159 | rs7664830 |
| rs10142564 | rs12554263 | rs17087648 | rs2133829 | rs3805739 | rs6129200 | rs7665771 |
| rs10143004 | rs12559632 | rs17087795 | rs2134333 | rs3807051 | rs6129215 | rs766621  |
| rs10143368 | rs12561888 | rs17089230 | rs2135706 | rs3807121 | rs6130608 | rs7666956 |
| rs10143711 | rs12566065 | rs17089405 | rs2135845 | rs3807386 | rs6130735 | rs7668237 |
| rs10143800 | rs12566375 | rs17090158 | rs213653  | rs3808745 | rs6131425 | rs766954  |
| rs10144017 | rs12568008 | rs17090873 | rs2137911 | rs3809258 | rs613326  | rs7669969 |
| rs1014445  | rs12568126 | rs17090925 | rs2137946 | rs3809381 | rs6134320 | rs7670330 |
| rs1014465  | rs12569026 | rs17091445 | rs2138555 | rs3811007 | rs6134741 | rs7673403 |
| rs10144765 | rs12569591 | rs17092536 | rs2138760 | rs3811011 | rs6136556 | rs7674308 |
| rs10149012 | rs1256964  | rs17092667 | rs2138852 | rs3811243 | rs6136836 | rs7674376 |
| rs10149186 | rs1257019  | rs17094108 | rs2140040 | rs3812412 | rs6139494 | rs76750   |
| rs10150121 | rs1257022  | rs17094229 | rs2140717 | rs3813068 | rs6141319 | rs767533  |
| rs10150802 | rs12573101 | rs17094891 | rs2141753 | rs3814582 | rs6141662 | rs7677592 |
| rs10151458 | rs12575163 | rs17095201 | rs2141834 | rs3815901 | rs6141743 | rs7678302 |
| rs10151544 | rs12578026 | rs17095685 | rs2143255 | rs3815947 | rs6142649 | rs7678640 |
| rs10153403 | rs12579299 | rs17098079 | rs2143715 | rs3816032 | rs614910  | rs7678870 |
| rs10156621 | rs12579460 | rs17098310 | rs2144065 | rs3816815 | rs615549  | rs7679074 |
| rs10157095 | rs12581421 | rs17098343 | rs2144183 | rs3817198 | rs615563  | rs768061  |
| rs10158534 | rs1258201  | rs17099052 | rs2144446 | rs3818320 | rs615942  | rs7681861 |
| rs10159927 | rs12584415 | rs1709948  | rs2145382 | rs3819579 | rs616114  | rs7683446 |
| rs1016229  | rs12584584 | rs17100090 | rs2145752 | rs3820048 | rs616553  | rs7683919 |
| rs1016259  | rs12584835 | rs17100254 | rs2146838 | rs3820667 | rs617222  | rs7685533 |
| rs10163360 | rs1258571  | rs17100307 | rs2147317 | rs3820785 | rs618385  | rs7686941 |
| rs10163968 | rs12585842 | rs17100409 | rs2148186 | rs3821060 | rs621232  | rs7688237 |
| rs10165122 | rs12586207 | rs17100482 | rs2148562 | rs3821502 | rs623234  | rs7688340 |
| rs10165485 | rs12587659 | rs17102403 | rs2148692 | rs3821525 | rs6234    | rs7689694 |
| rs1016598  | rs12587845 | rs17103001 | rs2149819 | rs3822056 | rs6235    | rs7690426 |
| rs10168275 | rs12589932 | rs17103805 | rs2150504 | rs3823082 | rs623570  | rs7690431 |
| rs1016973  | rs12589981 | rs17103881 | rs2151065 | rs3823499 | rs623646  | rs7690582 |
| rs10169963 | rs12590446 | rs17104770 | rs2151616 | rs3825511 | rs625152  | rs769097  |
| rs1017036  | rs12592766 | rs17104889 | rs215231  | rs3826638 | rs625614  | rs7691394 |
| rs1017041  | rs1259312  | rs17105269 | rs2152543 | rs3826944 | rs626080  | rs7692196 |
| rs1017050  | rs12593509 | rs17106001 | rs2152836 | rs3828118 | rs626566  | rs7692616 |
| rs10173788 | rs12593575 | rs17106389 | rs2152905 | rs3828179 | rs629342  | rs7694730 |
| rs10175949 | rs12593630 | rs17107030 | rs2155302 | rs3843009 | rs631827  | rs7695303 |
| rs10176594 | rs12594165 | rs17108146 | rs2155338 | rs384323  | rs632185  | rs7696176 |
| rs10177265 | rs12597906 | rs17108214 | rs2155954 | rs3843340 | rs632186  | rs7696217 |
| rs10177811 | rs12598394 | rs17108218 | rs2158376 | rs3843347 | rs633208  | rs7697319 |
| rs1017804  | rs12599188 | rs17110103 | rs2158769 | rs3843364 | rs633429  | rs7698209 |
| rs1017822  | rs1260011  | rs17110243 | rs2159074 | rs3843370 | rs634487  | rs7700717 |
| rs10180783 | rs12600232 | rs17110987 | rs216009  | rs3844144 | rs634489  | rs7700874 |
| rs10182101 | rs12603061 | rs17111394 | rs2160444 | rs3844176 | rs635362  | rs7701443 |
| rs10182643 | rs12603380 | rs17111690 | rs2160486 | rs3844190 | rs637396  | rs770166  |
| rs10186746 | rs12604965 | rs17111856 | rs2160621 | rs3845970 | rs638000  | rs7703210 |
| rs1018738  | rs12605527 | rs1711122  | rs2161186 | rs3846370 | rs638319  | rs770375  |
| rs10187892 | rs12605874 | rs17112308 | rs2161916 | rs3846600 | rs638501  | rs7704183 |
| rs1018834  | rs12605893 | rs17112713 | rs2163344 | rs3847076 | rs640428  | rs7706278 |
| rs10191436 | rs12606444 | rs17113869 | rs2163565 | rs3847174 | rs640493  | rs7706824 |
| rs10192881 | rs12611712 | rs17114754 | rs2163568 | rs3847273 | rs6414591 | rs7707067 |
| rs10193032 | rs12613336 | rs17115891 | rs2163901 | rs3847800 | rs6415184 | rs771145  |
| rs10193972 | rs12613343 | rs17116246 | rs2164284 | rs3848127 | rs6417014 | rs7712048 |
| rs1019469  | rs12613940 | rs17117888 | rs216487  | rs3849773 | rs6418331 | rs7712252 |
| rs10196672 | rs12614546 | rs17119127 | rs2165698 | rs3850205 | rs6419373 | rs771261  |
| rs1019670  | rs12615013 | rs17119457 | rs2166041 | rs3850988 | rs6421590 | rs771277  |
| rs10197924 | rs12615525 | rs17119743 | rs2167029 | rs3851301 | rs6421596 | rs7712988 |
| rs10198057 | rs12616256 | rs17119821 | rs2167151 | rs3851364 | rs6422002 | rs7713108 |

|            |            |            |           |           |           |           |
|------------|------------|------------|-----------|-----------|-----------|-----------|
| rs10198477 | rs12618490 | rs17120353 | rs2167272 | rs3851647 | rs6422395 | rs7713115 |
| rs10201005 | rs12620348 | rs17120641 | rs2167299 | rs3851681 | rs6424201 | rs7715156 |
| rs10201163 | rs12621296 | rs17120727 | rs2168036 | rs3852118 | rs6424279 | rs7715499 |
| rs10201348 | rs12621500 | rs17121439 | rs2168159 | rs3852178 | rs6424449 | rs771640  |
| rs10202226 | rs12623962 | rs17121908 | rs2168838 | rs3852789 | rs642516  | rs7718486 |
| rs10203019 | rs1262398  | rs17121917 | rs2168924 | rs385560  | rs6426482 | rs7718509 |
| rs10203979 | rs12624843 | rs17122446 | rs2169612 | rs3856442 | rs6426903 | rs7719360 |
| rs10206309 | rs12627839 | rs17122532 | rs216996  | rs3856930 | rs6426905 | rs771942  |
| rs10206681 | rs12628389 | rs17123103 | rs2170505 | rs3857481 | rs6426936 | rs7720160 |
| rs1020700  | rs12629514 | rs17124433 | rs217091  | rs3857700 | rs6426940 | rs7720595 |
| rs10207490 | rs12630703 | rs17124984 | rs2171838 | rs3858054 | rs6429198 | rs7721886 |
| rs10207726 | rs1263127  | rs17126    | rs2172453 | rs3858646 | rs6429318 | rs7723462 |
| rs1020944  | rs12632607 | rs17126131 | rs2173461 | rs3859563 | rs6429651 | rs7725072 |
| rs10209573 | rs12634826 | rs17126230 | rs217378  | rs386124  | rs6430788 | rs7725100 |
| rs10210192 | rs12635682 | rs17126427 | rs2173895 | rs3861300 | rs6431271 | rs772814  |
| rs10211377 | rs1263605  | rs17127005 | rs2173957 | rs386188  | rs6431413 | rs7728232 |
| rs10212789 | rs12636769 | rs17127323 | rs2174008 | rs3862956 | rs6431550 | rs7730762 |
| rs1021312  | rs12637500 | rs17127422 | rs2174721 | rs3863727 | rs6432039 | rs7731577 |
| rs10215711 | rs12637858 | rs17127934 | rs2174904 | rs3864991 | rs6433199 | rs7734436 |
| rs10216851 | rs12638077 | rs17127992 | rs2175192 | rs3872614 | rs6433735 | rs7735089 |
| rs1021775  | rs12638409 | rs17128445 | rs2175903 | rs387816  | rs6435268 | rs7735096 |
| rs1021948  | rs12639390 | rs17128706 | rs2176090 | rs387883  | rs643562  | rs7735361 |
| rs10220127 | rs12640744 | rs17129607 | rs2176138 | rs3884580 | rs6436887 | rs773566  |
| rs10222587 | rs12641663 | rs17130908 | rs2176263 | rs3886389 | rs6437244 | rs773586  |
| rs10222862 | rs12642792 | rs17132619 | rs217677  | rs3888797 | rs6437255 | rs773588  |
| rs10225959 | rs12643687 | rs17133431 | rs2176921 | rs3890423 | rs6437379 | rs7736604 |
| rs10226018 | rs12644922 | rs17133433 | rs217756  | rs3890806 | rs6437745 | rs7738367 |
| rs1023024  | rs1264550  | rs17133453 | rs2178152 | rs3890821 | rs6438003 | rs7739382 |
| rs10231161 | rs12647927 | rs17134719 | rs2178637 | rs3891857 | rs6438015 | rs7741412 |
| rs10231248 | rs12649867 | rs17135357 | rs2178788 | rs3893267 | rs6438697 | rs7742014 |
| rs1023128  | rs1265217  | rs17135360 | rs2179258 | rs3898586 | rs6439389 | rs7742144 |
| rs1023197  | rs12653851 | rs17138855 | rs2179903 | rs3898649 | rs6439591 | rs7742173 |
| rs1023713  | rs12653941 | rs17139127 | rs2180267 | rs3900150 | rs6439690 | rs7742224 |
| rs1023849  | rs12656313 | rs17140052 | rs2180335 | rs3900940 | rs6439982 | rs7743827 |
| rs1023859  | rs12656556 | rs17140435 | rs2180834 | rs3901316 | rs6440072 | rs7744034 |
| rs10240043 | rs12657037 | rs17140446 | rs2182296 | rs3902530 | rs6440074 | rs7744366 |
| rs10242789 | rs12657079 | rs17143909 | rs2182571 | rs3903670 | rs644016  | rs7744482 |
| rs1024454  | rs12658034 | rs17144145 | rs218282  | rs3904776 | rs6441573 | rs7745298 |
| rs10245285 | rs12658840 | rs1714509  | rs2183365 | rs3904872 | rs6442499 | rs7745352 |
| rs10246819 | rs12659608 | rs17145888 | rs2183443 | rs3907714 | rs6442737 | rs7746692 |
| rs10247408 | rs12662071 | rs17146104 | rs2183456 | rs3912477 | rs6443014 | rs7746706 |
| rs10247590 | rs1266344  | rs17148577 | rs2183587 | rs3912493 | rs6443419 | rs7748524 |
| rs1024782  | rs12670004 | rs17148786 | rs2183614 | rs3912927 | rs6443448 | rs7749384 |
| rs10248309 | rs12670788 | rs17148873 | rs2183616 | rs3913323 | rs6443449 | rs7750814 |
| rs10251271 | rs12671    | rs17149775 | rs2183617 | rs3915267 | rs6443904 | rs7751450 |
| rs10252651 | rs12675749 | rs17149863 | rs2183633 | rs3915519 | rs6444188 | rs7752107 |
| rs10252916 | rs12676614 | rs17150369 | rs2185374 | rs3915693 | rs6444504 | rs7752172 |
| rs1025438  | rs12676794 | rs17150909 | rs2185961 | rs3915915 | rs6445538 | rs775219  |
| rs10258707 | rs12676935 | rs17152738 | rs2189057 | rs3916906 | rs6445726 | rs7752893 |
| rs10261634 | rs1267719  | rs17154110 | rs2189722 | rs3919487 | rs6445754 | rs7754859 |
| rs10262524 | rs12677648 | rs17154508 | rs2190047 | rs39206   | rs6445902 | rs7755699 |
| rs10263252 | rs12677823 | rs17155529 | rs2190118 | rs3922373 | rs6446315 | rs7757937 |
| rs10265478 | rs1268169  | rs17156360 | rs2190838 | rs3922590 | rs6446589 | rs7759056 |
| rs10267111 | rs12682429 | rs1715843  | rs2190907 | rs3922885 | rs6447076 | rs7759303 |
| rs10267165 | rs12692485 | rs17162693 | rs2191133 | rs3922936 | rs6447088 | rs7760509 |
| rs10267436 | rs12692585 | rs17163135 | rs2191173 | rs3923210 | rs6447377 | rs7760997 |
| rs10267669 | rs12693032 | rs17163508 | rs2191179 | rs3923434 | rs6447505 | rs7761436 |
| rs10267950 | rs1269452  | rs17163714 | rs2192473 | rs3923530 | rs6447991 | rs7761587 |
| rs10268214 | rs1269480  | rs17164594 | rs2192595 | rs3923790 | rs6448004 | rs7762414 |
| rs10269805 | rs12694800 | rs17164697 | rs2192770 | rs3924142 | rs6448478 | rs7763278 |
| rs1027263  | rs12697392 | rs17165050 | rs2193218 | rs3924604 | rs6448819 | rs7764372 |
| rs1027266  | rs12700829 | rs17167306 | rs219481  | rs3924658 | rs6449586 | rs776472  |
| rs1027355  | rs12701024 | rs17168353 | rs2197008 | rs3924777 | rs6451151 | rs7765207 |

|            |            |            |           |           |           |           |
|------------|------------|------------|-----------|-----------|-----------|-----------|
| rs10274553 | rs12701226 | rs17170207 | rs219780  | rs3924810 | rs645167  | rs7765620 |
| rs10275385 | rs12702372 | rs17170931 | rs2199215 | rs3930087 | rs645170  | rs7766159 |
| rs10276733 | rs12704979 | rs17171412 | rs2199466 | rs3931643 | rs6453397 | rs7766405 |
| rs1027837  | rs12708372 | rs171716   | rs2200204 | rs39327   | rs6453613 | rs7767835 |
| rs10278690 | rs12711812 | rs17171718 | rs2200457 | rs3932728 | rs6453914 | rs776943  |
| rs10278715 | rs12713333 | rs17172273 | rs2204175 | rs3933394 | rs6454648 | rs7770134 |
| rs10278819 | rs12713497 | rs17172644 | rs2204904 | rs3934535 | rs6454789 | rs7770529 |
| rs10280231 | rs12713590 | rs17173113 | rs2205113 | rs3934645 | rs6456454 | rs777216  |
| rs10280277 | rs12716687 | rs17173620 | rs2206021 | rs3935014 | rs6456456 | rs777354  |
| rs10281287 | rs12717366 | rs17174712 | rs2206353 | rs3935534 | rs6456457 | rs7773613 |
| rs10281536 | rs12729863 | rs17174756 | rs2206382 | rs3935592 | rs6458492 | rs7774757 |
| rs1028279  | rs1273793  | rs17177040 | rs2206609 | rs3936131 | rs6459446 | rs7775    |
| rs1028347  | rs12738827 | rs17177931 | rs2206860 | rs3936653 | rs6459792 | rs7776786 |
| rs1028394  | rs12739347 | rs17180845 | rs2207309 | rs393952  | rs6459925 | rs7776974 |
| rs1028496  | rs12740330 | rs17180956 | rs2207321 | rs394571  | rs6460058 | rs7777255 |
| rs1029675  | rs12744540 | rs17181606 | rs220740  | rs3946180 | rs6460446 | rs7778311 |
| rs1030423  | rs12744555 | rs1718312  | rs2208167 | rs3950619 | rs6461090 | rs7778393 |
| rs1032596  | rs12745358 | rs17184313 | rs2208486 | rs395349  | rs6463006 | rs7778840 |
| rs1033060  | rs12746396 | rs17184658 | rs2209684 | rs3957543 | rs6463266 | rs7778897 |
| rs1033524  | rs12748993 | rs17186582 | rs2210801 | rs3961919 | rs6464907 | rs7780775 |
| rs1034591  | rs1274931  | rs17186688 | rs2212602 | rs396345  | rs6466756 | rs7782258 |
| rs1035029  | rs12749736 | rs17186875 | rs2213340 | rs3975198 | rs6466899 | rs7782921 |
| rs1035150  | rs12750241 | rs17186961 | rs2213645 | rs399203  | rs6466914 | rs778356  |
| rs1035388  | rs1275584  | rs17187454 | rs2213810 | rs399593  | rs6467650 | rs778489  |
| rs1035572  | rs12757566 | rs17189689 | rs2214446 | rs4001107 | rs6468442 | rs7785823 |
| rs1036373  | rs12763779 | rs17189820 | rs2214640 | rs400540  | rs6469217 | rs7787805 |
| rs1036471  | rs1276408  | rs17190785 | rs2215379 | rs400706  | rs6469560 | rs7789417 |
| rs1036522  | rs12764596 | rs17191268 | rs2216220 | rs400946  | rs6469615 | rs778972  |
| rs1037033  | rs12768463 | rs17193445 | rs221721  | rs401342  | rs6469633 | rs7789801 |
| rs1037715  | rs1276856  | rs17193595 | rs221724  | rs402394  | rs6469640 | rs7790895 |
| rs1038046  | rs12770182 | rs17194131 | rs2217884 | rs402824  | rs6470289 | rs7790976 |
| rs1038155  | rs12771893 | rs17194378 | rs2218793 | rs4030333 | rs6470294 | rs7791134 |
| rs1038323  | rs12775323 | rs171951   | rs2219244 | rs403746  | rs6470466 | rs7791586 |
| rs1038673  | rs12778673 | rs17196046 | rs2220790 | rs4043279 | rs6470590 | rs7791708 |
| rs1038883  | rs12785018 | rs17196820 | rs2222735 | rs4061785 | rs6470637 | rs7792636 |
| rs10400124 | rs12787442 | rs17197854 | rs2222902 | rs406418  | rs6470863 | rs779374  |
| rs10400315 | rs1278957  | rs17198858 | rs2222940 | rs4069938 | rs6471542 | rs7794269 |
| rs1040583  | rs12790840 | rs17200542 | rs2223071 | rs4072101 | rs6474788 | rs7794474 |
| rs1040954  | rs12793619 | rs17201051 | rs2223406 | rs4072193 | rs6475315 | rs7794737 |
| rs10411529 | rs12793785 | rs17201075 | rs2223659 | rs4072214 | rs6475456 | rs7797034 |
| rs1041375  | rs12795310 | rs17203878 | rs2223839 | rs4072519 | rs6476878 | rs7797522 |
| rs1041409  | rs12797612 | rs17206232 | rs2224751 | rs4072661 | rs6477719 | rs779922  |
| rs1041439  | rs12797960 | rs17206714 | rs222489  | rs4072735 | rs6477804 | rs779925  |
| rs10414630 | rs12799462 | rs17207529 | rs2224980 | rs4072809 | rs6478010 | rs780225  |
| rs10416925 | rs12800573 | rs17207801 | rs2226849 | rs4072829 | rs6478270 | rs7803197 |
| rs10419408 | rs12801369 | rs17208201 | rs2227973 | rs4072858 | rs6479028 | rs7803471 |
| rs1042031  | rs12801667 | rs17209129 | rs2229583 | rs4073042 | rs6480584 | rs7805035 |
| rs10422305 | rs12806493 | rs1721016  | rs2230601 | rs4073365 | rs6480883 | rs7805251 |
| rs10422751 | rs1280995  | rs1721100  | rs2231398 | rs4074080 | rs6481247 | rs7808067 |
| rs1042640  | rs12811832 | rs17211259 | rs2231940 | rs4074733 | rs6481309 | rs780846  |
| rs10426516 | rs12814794 | rs17211285 | rs2232548 | rs4074776 | rs6482726 | rs7809253 |
| rs10428982 | rs1281813  | rs17211392 | rs2234246 | rs4074946 | rs6482761 | rs7810517 |
| rs10429825 | rs12821299 | rs17211516 | rs2235132 | rs4075060 | rs6482876 | rs7810629 |
| rs10429892 | rs1282444  | rs17211889 | rs2235275 | rs4075276 | rs6483478 | rs7812186 |
| rs1043144  | rs12824686 | rs17212491 | rs2235927 | rs4075950 | rs6485221 | rs7818219 |
| rs10431570 | rs12825103 | rs17214592 | rs2236052 | rs4075970 | rs6486538 | rs7818631 |
| rs10435260 | rs12825313 | rs17216229 | rs2236179 | rs4076072 | rs6486647 | rs7818744 |
| rs10435449 | rs12825566 | rs17217297 | rs2237129 | rs4076163 | rs6486961 | rs7820007 |
| rs10437458 | rs1282558  | rs17218031 | rs2237195 | rs4077060 | rs6487006 | rs7820988 |
| rs10439990 | rs12829521 | rs17218608 | rs2237342 | rs4077922 | rs6487091 | rs7827766 |
| rs1044095  | rs12833456 | rs17218667 | rs2237353 | rs4077939 | rs6488494 | rs782841  |
| rs10443    | rs12836976 | rs17223429 | rs2237803 | rs4078152 | rs6489163 | rs782894  |
| rs10447178 | rs12851384 | rs17223438 | rs2238092 | rs4078513 | rs6489697 | rs7829144 |

|            |            |            |           |           |           |           |
|------------|------------|------------|-----------|-----------|-----------|-----------|
| rs10450393 | rs12852381 | rs17223490 | rs2238142 | rs408288  | rs6490100 | rs782918  |
| rs10450405 | rs1285286  | rs17224106 | rs2239089 | rs40838   | rs6490318 | rs782930  |
| rs10454133 | rs12856048 | rs17224342 | rs2239139 | rs40848   | rs649055  | rs7830174 |
| rs10455344 | rs1285767  | rs17225519 | rs2239680 | rs41134   | rs6490765 | rs783027  |
| rs10456274 | rs12858428 | rs17227150 | rs2240089 | rs4121202 | rs6490877 | rs7832342 |
| rs10458088 | rs1286027  | rs17227267 | rs2240293 | rs4122274 | rs6491176 | rs7834600 |
| rs10458496 | rs12861218 | rs17229055 | rs2240525 | rs412485  | rs6492919 | rs7835162 |
| rs10460250 | rs1286289  | rs17231019 | rs2240794 | rs41272   | rs6493372 | rs7835321 |
| rs1046236  | rs12868874 | rs17231230 | rs2241003 | rs4128873 | rs6493661 | rs7836264 |
| rs10464059 | rs12877320 | rs17232021 | rs2241044 | rs4129487 | rs6494230 | rs7836908 |
| rs10464364 | rs12881527 | rs17234826 | rs2241046 | rs4129491 | rs649437  | rs7837755 |
| rs10466425 | rs12885724 | rs17236056 | rs224177  | rs4131058 | rs6495047 | rs7838079 |
| rs10467030 | rs12885917 | rs17236161 | rs2241821 | rs4131331 | rs6496022 | rs7838449 |
| rs10468114 | rs12887575 | rs17237780 | rs224186  | rs413203  | rs6496314 | rs7838588 |
| rs10468743 | rs12889177 | rs17237837 | rs2241969 | rs4132338 | rs6496465 | rs7840226 |
| rs10468776 | rs12891181 | rs17239169 | rs2242143 | rs4132376 | rs649651  | rs7840407 |
| rs10468860 | rs12891897 | rs17239265 | rs2242297 | rs4132417 | rs6496622 | rs7842158 |
| rs10469238 | rs12894544 | rs17239575 | rs2242783 | rs4132838 | rs6497153 | rs7843043 |
| rs1047339  | rs12897647 | rs17240784 | rs2243317 | rs4132904 | rs6497676 | rs7844288 |
| rs10474263 | rs12900227 | rs17241866 | rs2243393 | rs4133368 | rs6497852 | rs7844731 |
| rs10474527 | rs12900861 | rs17242903 | rs2243454 | rs4133879 | rs6497883 | rs7844770 |
| rs10476873 | rs12901001 | rs17243319 | rs2244287 | rs4134831 | rs6498382 | rs7845077 |
| rs1047796  | rs12902654 | rs17243330 | rs2244445 | rs4134860 | rs649841  | rs7845273 |
| rs10479785 | rs12902723 | rs17243826 | rs2244512 | rs413610  | rs6499736 | rs7845599 |
| rs1048103  | rs12903400 | rs17245311 | rs2245500 | rs413912  | rs6501042 | rs7846137 |
| rs10482853 | rs12905457 | rs17245760 | rs2246610 | rs4140679 | rs6501523 | rs7846270 |
| rs10483512 | rs12906025 | rs17246110 | rs2247662 | rs4140967 | rs6501536 | rs7846875 |
| rs10483559 | rs12906549 | rs17246425 | rs2247911 | rs4141162 | rs6502727 | rs7847799 |
| rs10483813 | rs1291149  | rs17246599 | rs2248319 | rs4141218 | rs6503060 | rs7849015 |
| rs10483937 | rs12912269 | rs17247313 | rs2248564 | rs4142312 | rs6503063 | rs7849327 |
| rs10484085 | rs1291396  | rs17247386 | rs224910  | rs4142542 | rs6503077 | rs7850284 |
| rs10484431 | rs12914795 | rs17247682 | rs2249115 | rs4144848 | rs6503427 | rs7850874 |
| rs1048445  | rs12915289 | rs17248276 | rs2249221 | rs4146381 | rs6504950 | rs7852479 |
| rs10484689 | rs12916709 | rs17248377 | rs2249911 | rs4146620 | rs6505397 | rs7853656 |
| rs10484891 | rs12918180 | rs17249740 | rs2249959 | rs4146753 | rs6505609 | rs7853939 |
| rs10484911 | rs12926797 | rs17249754 | rs2250226 | rs4146754 | rs6505816 | rs785467  |
| rs10485101 | rs12929303 | rs17251071 | rs2250227 | rs4146883 | rs6506068 | rs785483  |
| rs10485222 | rs1293135  | rs17252346 | rs2250672 | rs4146978 | rs6506769 | rs7854931 |
| rs10485420 | rs12932067 | rs17253570 | rs2250781 | rs4147108 | rs6506864 | rs7856248 |
| rs10485669 | rs1293455  | rs17253629 | rs2250861 | rs4147250 | rs650693  | rs7856505 |
| rs10485739 | rs12935567 | rs17255086 | rs2250992 | rs4149570 | rs6507844 | rs7856832 |
| rs10485804 | rs12936768 | rs17255247 | rs225119  | rs4150018 | rs6507945 | rs7858233 |
| rs10486014 | rs12939695 | rs17255628 | rs2251449 | rs41867   | rs6508824 | rs7858819 |
| rs10486848 | rs12940814 | rs17257454 | rs2251692 | rs419936  | rs6510472 | rs7858859 |
| rs10486973 | rs12942520 | rs17258452 | rs2251721 | rs42002   | rs6510681 | rs7859710 |
| rs10487024 | rs1294318  | rs17258663 | rs2251904 | rs420342  | rs651133  | rs7860182 |
| rs10487275 | rs12945260 | rs17259058 | rs2252098 | rs421821  | rs6511788 | rs7861051 |
| rs10488051 | rs12945337 | rs17260538 | rs2252208 | rs422751  | rs6511843 | rs7861420 |
| rs10488360 | rs12948143 | rs17260625 | rs2252265 | rs4233262 | rs6512223 | rs7862788 |
| rs10488998 | rs12950135 | rs17261572 | rs2252417 | rs4233602 | rs6512631 | rs7862804 |
| rs10489270 | rs12953185 | rs17262400 | rs2252686 | rs4233638 | rs6516523 | rs7863557 |
| rs10489493 | rs1295399  | rs17263187 | rs225277  | rs4233719 | rs6517105 | rs7863670 |
| rs10489977 | rs12954049 | rs1726357  | rs2252779 | rs4234886 | rs6517393 | rs7864052 |
| rs10490258 | rs12954779 | rs17264366 | rs2253215 | rs4234955 | rs6519030 | rs7864987 |
| rs10490782 | rs12955310 | rs17266101 | rs2253782 | rs4234992 | rs6519913 | rs7865618 |
| rs10490981 | rs12956443 | rs17268017 | rs2254742 | rs4236260 | rs652091  | rs7867327 |
| rs10491285 | rs12956638 | rs17268037 | rs2254826 | rs4236825 | rs652462  | rs7867693 |
| rs10491592 | rs12957053 | rs17268968 | rs2255146 | rs4236995 | rs6526548 | rs7867710 |
| rs10491649 | rs12957463 | rs17269164 | rs2255663 | rs4238219 | rs6529052 | rs7868074 |
| rs10491672 | rs12959440 | rs17269562 | rs2255805 | rs4238365 | rs6530311 | rs786848  |
| rs10491679 | rs12959893 | rs17269808 | rs2255842 | rs42384   | rs6530432 | rs7870926 |
| rs10492041 | rs12963210 | rs17270188 | rs2256135 | rs4238533 | rs6530875 | rs7871785 |
| rs10492058 | rs12964333 | rs17270931 | rs2256241 | rs4239045 | rs6531254 | rs7871803 |

|            |            |            |           |           |           |           |
|------------|------------|------------|-----------|-----------|-----------|-----------|
| rs10492503 | rs12968689 | rs17271519 | rs2256663 | rs4239389 | rs6531438 | rs7872321 |
| rs10492647 | rs1297263  | rs17272325 | rs2256882 | rs4239573 | rs6531762 | rs787333  |
| rs10492716 | rs12972995 | rs17272677 | rs22570   | rs4240663 | rs6531906 | rs7873355 |
| rs10492863 | rs12975011 | rs17272700 | rs2258497 | rs4241307 | rs6531968 | rs7873882 |
| rs10492954 | rs12975693 | rs17273109 | rs225909  | rs42417   | rs6532035 | rs7874104 |
| rs10493225 | rs1298582  | rs17273427 | rs2260129 | rs4241870 | rs6532058 | rs787493  |
| rs10493361 | rs12989728 | rs17276490 | rs2260219 | rs4242175 | rs6532071 | rs7875404 |
| rs10493483 | rs12991269 | rs17277587 | rs2260407 | rs4242311 | rs6532904 | rs7875770 |
| rs10493890 | rs12991606 | rs17278280 | rs2260971 | rs4242434 | rs6532929 | rs7875776 |
| rs10493976 | rs12991836 | rs17278732 | rs2261181 | rs4243221 | rs6532959 | rs7879993 |
| rs10494138 | rs12992029 | rs17279088 | rs2261472 | rs4244347 | rs6533259 | rs7880430 |
| rs10494845 | rs12994072 | rs1727911  | rs226313  | rs4245496 | rs6534263 | rs7881177 |
| rs10494936 | rs12999096 | rs17280004 | rs2264961 | rs4246207 | rs6534542 | rs7881606 |
| rs10495204 | rs13008638 | rs17280613 | rs2265067 | rs4246430 | rs6535218 | rs7887460 |
| rs10495341 | rs13010470 | rs17280636 | rs226515  | rs4246836 | rs6535248 | rs7891101 |
| rs10495463 | rs13011109 | rs17280750 | rs226516  | rs424723  | rs6535914 | rs7893671 |
| rs10496037 | rs13011884 | rs17281269 | rs2266591 | rs4254753 | rs6536086 | rs7896189 |
| rs10496126 | rs13014673 | rs17281832 | rs2266835 | rs425623  | rs6537664 | rs7896301 |
| rs10496192 | rs13015159 | rs17282465 | rs2266917 | rs4256375 | rs6537785 | rs7896781 |
| rs10496221 | rs13015218 | rs17282759 | rs2267106 | rs4258965 | rs6538343 | rs7896866 |
| rs10496386 | rs13016225 | rs17283290 | rs2267222 | rs4259608 | rs6538463 | rs7896909 |
| rs10496450 | rs13016677 | rs17284981 | rs2268114 | rs426045  | rs6538507 | rs7896980 |
| rs10496752 | rs13017182 | rs17286262 | rs2268970 | rs4263907 | rs6539043 | rs7897163 |
| rs10497340 | rs13017914 | rs17287085 | rs2269008 | rs4264397 | rs6539331 | rs7898685 |
| rs10497673 | rs13019835 | rs17287504 | rs2269551 | rs4264798 | rs6539588 | rs7900314 |
| rs10497820 | rs13020375 | rs17288588 | rs2269867 | rs4266000 | rs6539988 | rs7903236 |
| rs10497912 | rs13022395 | rs17288685 | rs2270302 | rs4266357 | rs6540223 | rs7903909 |
| rs10498126 | rs13025157 | rs17288916 | rs2270474 | rs4268714 | rs6540776 | rs790479  |
| rs10498274 | rs13026158 | rs17289013 | rs2270729 | rs4270426 | rs6540986 | rs7904899 |
| rs10498443 | rs13031572 | rs1729161  | rs2271432 | rs4271524 | rs6542827 | rs7905083 |
| rs10498620 | rs13031842 | rs17293289 | rs2272487 | rs427171  | rs6544203 | rs7906364 |
| rs10498638 | rs13033451 | rs17293769 | rs2273221 | rs4273018 | rs6544537 | rs7906744 |
| rs10498770 | rs13037020 | rs17294968 | rs2273929 | rs4273130 | rs6544629 | rs7906985 |
| rs10498975 | rs13038516 | rs17295346 | rs2274437 | rs4273515 | rs6544739 | rs7907609 |
| rs10499064 | rs13038557 | rs17295582 | rs2275059 | rs4273884 | rs6545534 | rs7907733 |
| rs10499135 | rs13039216 | rs17297046 | rs2275363 | rs427398  | rs6545756 | rs7908643 |
| rs10499279 | rs13045612 | rs17297383 | rs2275438 | rs4275708 | rs6545801 | rs7908686 |
| rs10499314 | rs13050704 | rs17298019 | rs2275580 | rs4276186 | rs6546094 | rs7909221 |
| rs10499475 | rs13051296 | rs17299124 | rs2275709 | rs4278539 | rs6547082 | rs7909889 |
| rs10499711 | rs13059876 | rs17301441 | rs2276542 | rs427903  | rs6547208 | rs7911876 |
| rs1050015  | rs13064363 | rs17302223 | rs2277225 | rs4279409 | rs6547235 | rs7912637 |
| rs10500383 | rs1306892  | rs17304488 | rs2277463 | rs4280085 | rs6548477 | rs7912872 |
| rs10500384 | rs13070127 | rs17304618 | rs227752  | rs4280770 | rs6548817 | rs7913509 |
| rs10500388 | rs13070334 | rs17304776 | rs2277598 | rs4282878 | rs6549011 | rs7914    |
| rs10500568 | rs13070884 | rs17305086 | rs2278868 | rs4283518 | rs654910  | rs7915341 |
| rs10500575 | rs13071750 | rs17305199 | rs2279    | rs4284186 | rs6549268 | rs7916571 |
| rs10500842 | rs13073399 | rs17305470 | rs2279383 | rs4285045 | rs6549270 | rs7916821 |
| rs10501377 | rs13074881 | rs17305979 | rs2279395 | rs4286276 | rs6549353 | rs7917093 |
| rs10501575 | rs13075781 | rs17306058 | rs2279574 | rs4286585 | rs6549358 | rs7920027 |
| rs10501636 | rs13079068 | rs17306376 | rs2279585 | rs4287477 | rs654993  | rs7920332 |
| rs10501879 | rs13079609 | rs17306725 | rs2279830 | rs4289395 | rs6550964 | rs7922576 |
| rs10502188 | rs13079811 | rs17307376 | rs2279839 | rs42903   | rs6551010 | rs7924035 |
| rs10502567 | rs130806   | rs17308588 | rs2280495 | rs4291146 | rs6551302 | rs792508  |
| rs10502879 | rs13081145 | rs17309195 | rs2280544 | rs4291690 | rs6551728 | rs7928370 |
| rs10502895 | rs13081581 | rs17309503 | rs2280726 | rs4292090 | rs6553015 | rs7930865 |
| rs10503354 | rs13082303 | rs17309953 | rs2280784 | rs4293602 | rs6553202 | rs7931298 |
| rs10503406 | rs13087507 | rs17310375 | rs2280789 | rs4300027 | rs6553774 | rs7931430 |
| rs10503496 | rs13088768 | rs17310924 | rs2280933 | rs4300459 | rs6553785 | rs7934301 |
| rs10503885 | rs13089250 | rs17312256 | rs2281143 | rs4301355 | rs6553998 | rs7935419 |
| rs10503899 | rs13090689 | rs17313083 | rs2281248 | rs4303283 | rs6554002 | rs7936502 |
| rs10504197 | rs13092170 | rs17313853 | rs2282316 | rs430373  | rs6554840 | rs7939829 |
| rs10504538 | rs13104279 | rs17314919 | rs2282411 | rs4304201 | rs655497  | rs7940019 |
| rs10504736 | rs13105054 | rs17315015 | rs2282529 | rs4305453 | rs6555069 | rs7940840 |

|            |            |            |           |           |           |           |
|------------|------------|------------|-----------|-----------|-----------|-----------|
| rs10505039 | rs13106677 | rs17316319 | rs2282819 | rs4307107 | rs6555665 | rs794185  |
| rs10505239 | rs13107226 | rs17319517 | rs2282822 | rs4308180 | rs6556533 | rs7942208 |
| rs10505762 | rs13108548 | rs17320150 | rs2282826 | rs4309439 | rs6556924 | rs7943016 |
| rs10505786 | rs13110927 | rs17320864 | rs2282943 | rs430962  | rs6557516 | rs7946936 |
| rs10505980 | rs13114280 | rs17321120 | rs2283171 | rs4310524 | rs6557988 | rs7947772 |
| rs10506171 | rs13114540 | rs17321311 | rs2283380 | rs4310791 | rs6558132 | rs7949310 |
| rs10506286 | rs13114982 | rs17322708 | rs2284037 | rs4311740 | rs6559349 | rs7950565 |
| rs10506678 | rs13115077 | rs17322758 | rs2284038 | rs4312524 | rs6559671 | rs7952540 |
| rs10506693 | rs13115333 | rs17323599 | rs2284706 | rs4314048 | rs655980  | rs7953    |
| rs10506740 | rs13115359 | rs17324622 | rs2285960 | rs4317381 | rs656134  | rs795429  |
| rs10506806 | rs13115756 | rs17324932 | rs2287251 | rs4318225 | rs6562099 | rs7954319 |
| rs10506927 | rs13121    | rs17325066 | rs2287310 | rs4318528 | rs6562438 | rs795432  |
| rs10507086 | rs13123051 | rs17325492 | rs2287403 | rs4321149 | rs6563660 | rs795435  |
| rs10507185 | rs13123672 | rs17325782 | rs2288069 | rs4321804 | rs6564337 | rs7955010 |
| rs10507275 | rs13126465 | rs17326080 | rs2288133 | rs4321884 | rs6565191 | rs7955900 |
| rs10507586 | rs13126784 | rs17326205 | rs2288486 | rs4323302 | rs6565550 | rs7956696 |
| rs10508016 | rs13131600 | rs17327121 | rs2288620 | rs4323689 | rs6565642 | rs7958140 |
| rs10508059 | rs131320   | rs17328054 | rs2288803 | rs4330343 | rs6566629 | rs7959227 |
| rs10508277 | rs13133676 | rs17330335 | rs2289230 | rs433311  | rs6566862 | rs7959267 |
| rs10508490 | rs13134777 | rs17331030 | rs228934  | rs4334205 | rs6567201 | rs7959831 |
| rs10508575 | rs13136890 | rs17331129 | rs2290386 | rs4339278 | rs6567232 | rs7960175 |
| rs10508940 | rs13141107 | rs17331662 | rs2290465 | rs4340411 | rs6569115 | rs7960855 |
| rs10509121 | rs13141523 | rs173323   | rs2290650 | rs4341110 | rs6569454 | rs7960880 |
| rs10509199 | rs13141798 | rs17335051 | rs2291248 | rs4343372 | rs6569863 | rs7960895 |
| rs10509271 | rs13142636 | rs17335630 | rs2291533 | rs4343583 | rs6571501 | rs7961520 |
| rs10509338 | rs13143997 | rs17336525 | rs2291681 | rs434364  | rs6572102 | rs7963788 |
| rs10509600 | rs13145926 | rs17338184 | rs2292011 | rs4344487 | rs6572531 | rs7964734 |
| rs10509906 | rs13148015 | rs17338311 | rs2292029 | rs434470  | rs6572567 | rs7966410 |
| rs10510036 | rs13148678 | rs17338554 | rs2292387 | rs4345581 | rs6573053 | rs7967117 |
| rs10510254 | rs13150631 | rs17338569 | rs2292388 | rs4346653 | rs6573606 | rs7967384 |
| rs10510333 | rs13152024 | rs17339892 | rs2292462 | rs4347023 | rs6574220 | rs7967976 |
| rs10510376 | rs13152458 | rs17340054 | rs2292778 | rs4347230 | rs6574512 | rs796829  |
| rs10510518 | rs13155413 | rs17341345 | rs2292796 | rs4347731 | rs6574547 | rs7969527 |
| rs10510590 | rs13158096 | rs17343066 | rs2293693 | rs4348784 | rs6575209 | rs7970346 |
| rs10510900 | rs1316038  | rs17345327 | rs2293767 | rs4352831 | rs6575440 | rs7970646 |
| rs10511352 | rs13160599 | rs17347255 | rs2294512 | rs435368  | rs6575845 | rs7971175 |
| rs10511409 | rs13162280 | rs17347522 | rs2294758 | rs4353790 | rs6576055 | rs797348  |
| rs10511694 | rs13162753 | rs17348455 | rs2294759 | rs4354222 | rs6577102 | rs7973666 |
| rs10511944 | rs13164340 | rs17349049 | rs2294771 | rs4355658 | rs6577231 | rs7973675 |
| rs10512039 | rs13164907 | rs17349075 | rs2295153 | rs4355854 | rs6577648 | rs7974531 |
| rs10512082 | rs13167351 | rs17349255 | rs2295706 | rs4355984 | rs6577902 | rs7976374 |
| rs10512121 | rs1316952  | rs17349321 | rs2296380 | rs4357716 | rs6578849 | rs7976606 |
| rs10512686 | rs13169858 | rs17349622 | rs2297596 | rs4359472 | rs657929  | rs7979386 |
| rs10512792 | rs13170041 | rs17350806 | rs2297607 | rs4360943 | rs6580149 | rs7980194 |
| rs10512935 | rs1317201  | rs17350942 | rs2298032 | rs4361282 | rs6580582 | rs7982597 |
| rs1051338  | rs13174283 | rs17352947 | rs2298075 | rs4361337 | rs6581848 | rs7982612 |
| rs10513704 | rs1317586  | rs17354021 | rs2298233 | rs4361654 | rs6581850 | rs7982683 |
| rs10514092 | rs13177990 | rs17355381 | rs2299056 | rs4363185 | rs6582009 | rs7982826 |
| rs10514099 | rs13180001 | rs1735562  | rs2299260 | rs436415  | rs658206  | rs7982957 |
| rs10514817 | rs13182782 | rs17356316 | rs2299447 | rs4365417 | rs6582130 | rs7985535 |
| rs10515396 | rs13184473 | rs173564   | rs2299546 | rs4367906 | rs6584304 | rs7986175 |
| rs10515584 | rs13186063 | rs17361586 | rs2299561 | rs4368658 | rs6584466 | rs7986261 |
| rs10515869 | rs13187457 | rs17363372 | rs2299851 | rs4371513 | rs6587161 | rs7986370 |
| rs10515946 | rs1318822  | rs17363526 | rs230015  | rs4374884 | rs658735  | rs7986985 |
| rs10516068 | rs13188259 | rs17363597 | rs2300234 | rs4375355 | rs6587360 | rs7988766 |
| rs10516088 | rs13192915 | rs17366343 | rs2300522 | rs4378021 | rs6589176 | rs7989425 |
| rs10516164 | rs13197182 | rs17366457 | rs2300541 | rs4378202 | rs6590224 | rs7989556 |
| rs10516176 | rs1319986  | rs17366510 | rs2300586 | rs437976  | rs6590248 | rs7990319 |
| rs10516339 | rs13201062 | rs17367052 | rs2301022 | rs4380699 | rs6590605 | rs7991211 |
| rs10516405 | rs1320126  | rs17368044 | rs2301521 | rs4382428 | rs659156  | rs7991338 |
| rs10516713 | rs1320308  | rs17368598 | rs2301845 | rs438258  | rs659211  | rs7993498 |
| rs10516863 | rs13204237 | rs17368978 | rs2302565 | rs4384685 | rs6592272 | rs7994792 |
| rs10516971 | rs13206269 | rs17370290 | rs2302596 | rs4384923 | rs6592508 | rs7996782 |



|            |            |            |           |           |           |           |
|------------|------------|------------|-----------|-----------|-----------|-----------|
| rs10517369 | rs13208251 | rs17373271 | rs2302757 | rs4386674 | rs6593537 | rs7996852 |
| rs10517382 | rs13209110 | rs17374165 | rs2303088 | rs4387687 | rs659405  | rs7998217 |
| rs10517569 | rs13210545 | rs17374941 | rs2303693 | rs4388990 | rs6594728 | rs799879  |
| rs10517628 | rs13212365 | rs17375764 | rs2303703 | rs4390481 | rs6595135 | rs7999311 |
| rs10517908 | rs1321373  | rs17376255 | rs2304428 | rs4390575 | rs6596224 | rs8000903 |
| rs10517910 | rs1321449  | rs17376795 | rs2304859 | rs4392535 | rs6597019 | rs8002851 |
| rs10518007 | rs1321774  | rs17376901 | rs230489  | rs4393295 | rs6598198 | rs8003741 |
| rs10518027 | rs13219468 | rs17378226 | rs2305398 | rs4393648 | rs6598324 | rs8004686 |
| rs10518114 | rs13224314 | rs17378546 | rs2305471 | rs4394891 | rs6598477 | rs8005236 |
| rs10518510 | rs1322914  | rs17379648 | rs2306331 | rs4395050 | rs659875  | rs8005808 |
| rs10518717 | rs1322937  | rs17380962 | rs2306508 | rs4397393 | rs6599261 | rs8006423 |
| rs10518741 | rs13230468 | rs17381964 | rs2306813 | rs4398609 | rs659952  | rs8006885 |
| rs10518997 | rs13236288 | rs17383211 | rs2306877 | rs4398760 | rs6599694 | rs8007856 |
| rs10519199 | rs1323800  | rs17385337 | rs2306879 | rs4402334 | rs6600792 | rs8008169 |
| rs10519387 | rs13239396 | rs17385688 | rs2308974 | rs4403157 | rs660098  | rs8008530 |
| rs10519574 | rs13242475 | rs17387155 | rs230898  | rs4404280 | rs6601443 | rs8009221 |
| rs10520079 | rs13244959 | rs17387919 | rs2309567 | rs440666  | rs6601491 | rs8009685 |
| rs10520430 | rs13246891 | rs17390720 | rs2309671 | rs4407145 | rs6601746 | rs8010537 |
| rs10520685 | rs13246896 | rs17390839 | rs2311333 | rs4410642 | rs6602174 | rs8010845 |
| rs10520770 | rs13248326 | rs17391055 | rs2311367 | rs4415339 | rs6602202 | rs801139  |
| rs10521146 | rs13248360 | rs17391809 | rs2312213 | rs4419576 | rs6602306 | rs8011464 |
| rs10521240 | rs13248532 | rs17391931 | rs2313148 | rs442028  | rs6602462 | rs8012043 |
| rs10521281 | rs13249013 | rs17393551 | rs2313234 | rs4420686 | rs6602595 | rs8013489 |
| rs1052161  | rs13250139 | rs17394294 | rs2313468 | rs4421110 | rs6604717 | rs8013684 |
| rs1052313  | rs1325054  | rs17394582 | rs231348  | rs4421314 | rs6608355 | rs8014950 |
| rs1053     | rs13251399 | rs17394626 | rs231352  | rs4424334 | rs6610493 | rs8014994 |
| rs1053006  | rs1325173  | rs17394924 | rs2314809 | rs4424659 | rs661489  | rs8015554 |
| rs1053088  | rs13252314 | rs17395997 | rs231505  | rs4425044 | rs661586  | rs8015875 |
| rs1053477  | rs1325287  | rs1739780  | rs2316280 | rs4425237 | rs6616577 | rs8016185 |
| rs1053926  | rs1325333  | rs17398999 | rs2316893 | rs4426765 | rs6619    | rs8016681 |
| rs1056204  | rs132541   | rs17399128 | rs2317627 | rs4427378 | rs6622104 | rs8016776 |
| rs1056237  | rs13254996 | rs17406061 | rs2317961 | rs4427595 | rs662382  | rs8018884 |
| rs1061027  | rs13255161 | rs17406704 | rs2317967 | rs4427850 | rs662526  | rs8019744 |
| rs1061474  | rs13257031 | rs17407228 | rs2318486 | rs4428241 | rs6626269 | rs802035  |
| rs1062633  | rs13257117 | rs17407322 | rs2319340 | rs4428455 | rs662655  | rs8020432 |
| rs1062746  | rs13258578 | rs17410209 | rs2320273 | rs4430495 | rs6628673 | rs8021274 |
| rs1063392  | rs1325880  | rs17411703 | rs2320333 | rs4431433 | rs6628807 | rs8021297 |
| rs1065272  | rs13260143 | rs17412056 | rs2321287 | rs4432624 | rs6629454 | rs8021611 |
| rs1070645  | rs1326062  | rs17412081 | rs2321313 | rs4436447 | rs6631041 | rs8021858 |
| rs1071502  | rs1326215  | rs17412093 | rs2321702 | rs4438483 | rs663220  | rs8021889 |
| rs10735024 | rs1326269  | rs17412366 | rs2321745 | rs4438515 | rs6632675 | rs8022486 |
| rs10735067 | rs1326279  | rs17412368 | rs232235  | rs4439674 | rs6632898 | rs8022516 |
| rs10735316 | rs1326357  | rs17415112 | rs2324003 | rs4440613 | rs6636509 | rs8023530 |
| rs10735491 | rs13267681 | rs17417862 | rs2326770 | rs4441804 | rs663818  | rs8023865 |
| rs10736112 | rs13268364 | rs17417943 | rs2327430 | rs4444907 | rs6638740 | rs8024058 |
| rs10736960 | rs1326940  | rs17418646 | rs2327717 | rs4444992 | rs6640079 | rs8025349 |
| rs10737609 | rs1327284  | rs17419728 | rs2328042 | rs4445064 | rs6641116 | rs802537  |
| rs10738434 | rs13272894 | rs17421133 | rs2332505 | rs4445211 | rs6641814 | rs8025551 |
| rs10738889 | rs1327328  | rs17421232 | rs2337019 | rs444538  | rs664421  | rs8026218 |
| rs10740696 | rs13273810 | rs17421942 | rs2337106 | rs4446093 | rs6648788 | rs8026735 |
| rs10741124 | rs13274205 | rs17422287 | rs2338    | rs4447967 | rs6649511 | rs802783  |
| rs10741540 | rs13274861 | rs17423976 | rs2341997 | rs4448135 | rs6650505 | rs8028220 |
| rs10742200 | rs13277117 | rs17424299 | rs2344564 | rs4450862 | rs6650905 | rs8029174 |
| rs10742308 | rs1327863  | rs17424885 | rs2344852 | rs4451357 | rs665354  | rs8030908 |
| rs10742658 | rs1327901  | rs17426062 | rs2345070 | rs4453078 | rs6656688 | rs8031055 |
| rs1074354  | rs13281615 | rs17426071 | rs2345079 | rs4455    | rs6657024 | rs8032921 |
| rs10744017 | rs13281665 | rs17426900 | rs234574  | rs4455453 | rs6658388 | rs803462  |
| rs10744682 | rs13282410 | rs17427051 | rs2346391 | rs4458026 | rs6658612 | rs8034910 |
| rs10748179 | rs1328413  | rs17430099 | rs2346634 | rs4458863 | rs6660559 | rs8034981 |
| rs10749395 | rs132857   | rs17431015 | rs2347902 | rs4461296 | rs6660811 | rs8035710 |
| rs10749570 | rs1328849  | rs17432897 | rs2348331 | rs4462596 | rs6661023 | rs8036968 |
| rs10749599 | rs13289673 | rs17433197 | rs2349851 | rs446480  | rs666107  | rs8037079 |
| rs10752798 | rs1329197  | rs17434144 | rs2350179 | rs4465954 | rs6661154 | rs8037418 |

|            |            |            |           |           |           |           |
|------------|------------|------------|-----------|-----------|-----------|-----------|
| rs10753302 | rs1329201  | rs17434381 | rs2350488 | rs4466264 | rs6663466 | rs8038834 |
| rs10754245 | rs1329411  | rs17434620 | rs2350571 | rs4467267 | rs6663827 | rs8039843 |
| rs1075560  | rs13294330 | rs17435702 | rs2352920 | rs4467658 | rs6664445 | rs8041414 |
| rs1075622  | rs13294435 | rs17435801 | rs2352930 | rs4468779 | rs666541  | rs8041685 |
| rs10756573 | rs13294547 | rs17437560 | rs235403  | rs4472343 | rs6665740 | rs8042109 |
| rs10758267 | rs13294922 | rs17437576 | rs2354495 | rs4473005 | rs6668687 | rs8042437 |
| rs10758702 | rs1329499  | rs17438631 | rs235470  | rs4473177 | rs6668839 | rs8042641 |
| rs10759644 | rs13299578 | rs17438829 | rs2356094 | rs4473280 | rs6669233 | rs8043118 |
| rs10760755 | rs1329982  | rs17439571 | rs2356929 | rs4473441 | rs6670755 | rs8045774 |
| rs10761643 | rs13300603 | rs1744206  | rs235771  | rs4474081 | rs6673237 | rs8046137 |
| rs10761650 | rs13303344 | rs17442317 | rs2358693 | rs4474561 | rs6674638 | rs8046880 |
| rs10761660 | rs1330431  | rs17442542 | rs2358730 | rs4475454 | rs667714  | rs8047478 |
| rs10763010 | rs1330662  | rs17442740 | rs2358748 | rs4475815 | rs667897  | rs8047530 |
| rs10763707 | rs1331297  | rs17444862 | rs2360838 | rs4476766 | rs6679368 | rs8049355 |
| rs10763759 | rs13315015 | rs17445631 | rs2361285 | rs4477207 | rs6679800 | rs8050548 |
| rs10764667 | rs13317898 | rs17446483 | rs2361494 | rs4477500 | rs6680903 | rs8051542 |
| rs10766118 | rs13326165 | rs17446605 | rs2361748 | rs447871  | rs6683473 | rs8051715 |
| rs10767793 | rs1332706  | rs17447586 | rs2362852 | rs448060  | rs6683572 | rs8052955 |
| rs1076913  | rs13327281 | rs17447609 | rs236389  | rs4481143 | rs668495  | rs8053229 |
| rs10770495 | rs1333191  | rs17448235 | rs2364118 | rs4481452 | rs6685131 | rs8053797 |
| rs10770506 | rs133347   | rs17448680 | rs2364164 | rs4481600 | rs668556  | rs805415  |
| rs10774168 | rs13336711 | rs17448763 | rs2364368 | rs4482257 | rs6686493 | rs8054379 |
| rs10774792 | rs133375   | rs17449339 | rs236504  | rs4482445 | rs6689038 | rs8054493 |
| rs10774894 | rs13337529 | rs17450567 | rs2365935 | rs4489843 | rs6691072 | rs8054536 |
| rs10776626 | rs13339424 | rs17452009 | rs2366385 | rs4489991 | rs6692144 | rs8055404 |
| rs10776722 | rs13339701 | rs17452458 | rs2366398 | rs4490091 | rs6692705 | rs8056528 |
| rs10777683 | rs13340461 | rs17455049 | rs2366818 | rs4490539 | rs669296  | rs8056534 |
| rs10777963 | rs1334100  | rs17455235 | rs2366887 | rs449616  | rs6693370 | rs805726  |
| rs10778108 | rs133426   | rs17455474 | rs236825  | rs4499886 | rs6693918 | rs8057700 |
| rs10779327 | rs1334821  | rs17456344 | rs236840  | rs4500099 | rs6693972 | rs8058108 |
| rs10779408 | rs133501   | rs17456724 | rs2369433 | rs4503188 | rs6694183 | rs805868  |
| rs10779512 | rs133515   | rs17457603 | rs2373358 | rs4503519 | rs6694986 | rs8059250 |
| rs10780675 | rs13353669 | rs17458353 | rs2373748 | rs4504959 | rs6696544 | rs8061410 |
| rs10782352 | rs1336615  | rs17458866 | rs2374390 | rs4505447 | rs6697315 | rs8061625 |
| rs10782363 | rs1337686  | rs17459754 | rs237451  | rs4505896 | rs6698828 | rs8061957 |
| rs10782716 | rs1338454  | rs17459989 | rs2375075 | rs4506147 | rs6699085 | rs8062983 |
| rs10782912 | rs13388498 | rs17460402 | rs2375143 | rs4506758 | rs6699172 | rs8064100 |
| rs1078333  | rs1339042  | rs17460812 | rs2375531 | rs4507002 | rs6700734 | rs8064512 |
| rs10783636 | rs1339207  | rs17462284 | rs2376382 | rs4508839 | rs6703304 | rs8065093 |
| rs10783639 | rs133926   | rs17464860 | rs2376907 | rs4510028 | rs6703320 | rs8065302 |
| rs10784274 | rs1339364  | rs17466389 | rs2377311 | rs4510240 | rs6703955 | rs8065364 |
| rs10786211 | rs1339375  | rs17466651 | rs237887  | rs451061  | rs6704652 | rs8068294 |
| rs10786980 | rs133943   | rs17468739 | rs2379266 | rs4511593 | rs670548  | rs8069500 |
| rs10787287 | rs133953   | rs17470011 | rs2379609 | rs4512241 | rs6705720 | rs8069556 |
| rs10788580 | rs1339797  | rs17470619 | rs2380450 | rs4513168 | rs6706821 | rs8069687 |
| rs1078975  | rs13398693 | rs17471302 | rs238141  | rs4513606 | rs670741  | rs8069941 |
| rs1078985  | rs1340010  | rs17471372 | rs2381609 | rs4513848 | rs6707527 | rs807013  |
| rs10790289 | rs13403557 | rs17472113 | rs2384311 | rs4518142 | rs6708230 | rs8070213 |
| rs10790341 | rs13405069 | rs17472211 | rs2385092 | rs4518326 | rs6708971 | rs8070260 |
| rs10792142 | rs13408924 | rs17473413 | rs238775  | rs4519000 | rs6712017 | rs8071973 |
| rs10792770 | rs13409792 | rs17474238 | rs2388881 | rs4520972 | rs671236  | rs8072823 |
| rs10792948 | rs1341007  | rs17475229 | rs2389257 | rs452157  | rs6712838 | rs807289  |
| rs10793104 | rs13412469 | rs17475339 | rs2390257 | rs4525692 | rs6713298 | rs8073332 |
| rs10793193 | rs1341468  | rs17477099 | rs2390277 | rs4526166 | rs6713572 | rs807353  |
| rs1079349  | rs13415049 | rs17477213 | rs2391038 | rs4526289 | rs6714112 | rs8074059 |
| rs1079428  | rs13415994 | rs17477949 | rs2391973 | rs4526751 | rs6714206 | rs8075246 |
| rs10794599 | rs1341788  | rs17478640 | rs2393144 | rs452772  | rs6716296 | rs8075449 |
| rs1079467  | rs13418113 | rs17479135 | rs2393372 | rs4528240 | rs6716388 | rs8077392 |
| rs10794850 | rs1342179  | rs17479660 | rs2394605 | rs4531970 | rs6716513 | rs8077653 |
| rs10795503 | rs13424039 | rs17479856 | rs2394631 | rs4532257 | rs6716776 | rs8078079 |
| rs10800476 | rs1342481  | rs17480280 | rs2394748 | rs4533240 | rs6719443 | rs807842  |
| rs10802705 | rs1342674  | rs17482021 | rs2394784 | rs4534095 | rs6719830 | rs8079524 |
| rs10802916 | rs13427356 | rs17482036 | rs2395848 | rs4535048 | rs6720063 | rs8079764 |

|            |            |            |           |           |           |           |
|------------|------------|------------|-----------|-----------|-----------|-----------|
| rs10803425 | rs1342867  | rs17482693 | rs239680  | rs4538607 | rs672041  | rs8079846 |
| rs10803609 | rs13429780 | rs17483365 | rs2396953 | rs4540369 | rs6720935 | rs8081054 |
| rs10804686 | rs1343019  | rs17483543 | rs2397990 | rs4541414 | rs6721693 | rs8081092 |
| rs10807401 | rs13435895 | rs17483803 | rs2398397 | rs454165  | rs6722232 | rs8081842 |
| rs10808697 | rs13440426 | rs17484273 | rs2398541 | rs4541738 | rs6722960 | rs8081928 |
| rs10809833 | rs1345197  | rs17484310 | rs2398820 | rs4543097 | rs6723362 | rs8082686 |
| rs10809917 | rs134527   | rs17484447 | rs2398871 | rs4543225 | rs6723508 | rs808275  |
| rs10810000 | rs1345959  | rs17488996 | rs2399809 | rs4543765 | rs6723620 | rs8083497 |
| rs10810124 | rs1346565  | rs17490687 | rs2400143 | rs4543877 | rs6723745 | rs8085346 |
| rs10810541 | rs1346787  | rs17490864 | rs2400979 | rs4551842 | rs6725303 | rs8087694 |
| rs10810967 | rs1346793  | rs17491260 | rs2401086 | rs4552938 | rs6725361 | rs8089528 |
| rs10811184 | rs1346865  | rs17491275 | rs2401514 | rs4554816 | rs6725770 | rs8090257 |
| rs10812251 | rs1347454  | rs17491427 | rs2402435 | rs4555724 | rs6726093 | rs8090665 |
| rs10812652 | rs1347504  | rs17491606 | rs2403547 | rs4555967 | rs6727716 | rs8090803 |
| rs10813280 | rs134767   | rs17491951 | rs2404003 | rs4557511 | rs6728330 | rs8090956 |
| rs10814107 | rs1347752  | rs17492079 | rs2404159 | rs4558821 | rs6729539 | rs8092259 |
| rs10814123 | rs1347772  | rs17492787 | rs2404802 | rs4560636 | rs6730915 | rs8092489 |
| rs10815472 | rs1347979  | rs17493058 | rs240495  | rs456210  | rs6732097 | rs8093893 |
| rs10815927 | rs134871   | rs17494050 | rs2405536 | rs4562928 | rs6732237 | rs8094006 |
| rs10816376 | rs1349282  | rs17494272 | rs2406744 | rs4563166 | rs6732245 | rs809439  |
| rs10816407 | rs1349348  | rs17495608 | rs2406759 | rs4563558 | rs6732434 | rs8095428 |
| rs10816459 | rs1350396  | rs17495782 | rs2407263 | rs4565150 | rs6733850 | rs8096276 |
| rs10817402 | rs1351313  | rs17500846 | rs240872  | rs4565982 | rs673449  | rs8097441 |
| rs10817976 | rs1351384  | rs17502085 | rs2408815 | rs4566542 | rs6735246 | rs8098175 |
| rs10818152 | rs1352016  | rs17502090 | rs2411139 | rs4567983 | rs6736482 | rs8098187 |
| rs10819898 | rs1352157  | rs17504106 | rs2411553 | rs4570309 | rs6738086 | rs8098233 |
| rs10820022 | rs1352700  | rs17505528 | rs2412112 | rs4570807 | rs673964  | rs8100481 |
| rs10820887 | rs1353113  | rs17506032 | rs2413857 | rs4570962 | rs6740246 | rs8104533 |
| rs10821668 | rs13538    | rs17506733 | rs2415443 | rs4571802 | rs6741387 | rs8104662 |
| rs10821699 | rs1354054  | rs17506977 | rs241588  | rs4572808 | rs6741513 | rs8106462 |
| rs10821704 | rs1354240  | rs17508455 | rs2416    | rs457365  | rs6742566 | rs810668  |
| rs10822035 | rs135477   | rs17509244 | rs2416901 | rs4574018 | rs6743039 | rs8107910 |
| rs10822095 | rs1354791  | rs17511194 | rs2417921 | rs4574391 | rs674316  | rs8109373 |
| rs10823579 | rs1355339  | rs17512442 | rs2418004 | rs4577620 | rs674372  | rs8109383 |
| rs10825243 | rs1355423  | rs17512745 | rs2418061 | rs4578863 | rs6743850 | rs8112254 |
| rs10826075 | rs1356998  | rs17513684 | rs2421048 | rs457915  | rs6744080 | rs8113158 |
| rs10827051 | rs13571    | rs17514440 | rs2421270 | rs4579267 | rs6745015 | rs8113251 |
| rs10827061 | rs1357245  | rs17516141 | rs2422193 | rs457936  | rs6745461 | rs8113638 |
| rs10828254 | rs1357707  | rs17516365 | rs2422421 | rs4585533 | rs6746604 | rs8115917 |
| rs10828374 | rs1358503  | rs17516415 | rs2422840 | rs4587119 | rs6746703 | rs8117696 |
| rs10829281 | rs1360155  | rs17520045 | rs2423422 | rs4588718 | rs6748231 | rs8118570 |
| rs10831605 | rs1360180  | rs17520060 | rs2424300 | rs458908  | rs6750402 | rs8121207 |
| rs10831997 | rs136081   | rs17522399 | rs2424301 | rs4589338 | rs6750911 | rs8121649 |
| rs10833412 | rs136090   | rs17523067 | rs2424590 | rs4589969 | rs6751660 | rs8126070 |
| rs10834458 | rs1361470  | rs17524590 | rs2425306 | rs4591132 | rs6752506 | rs8133510 |
| rs10834729 | rs136176   | rs17524808 | rs2426002 | rs4591333 | rs6752658 | rs8134617 |
| rs10839858 | rs1362273  | rs17525386 | rs2426725 | rs4592522 | rs6755403 | rs8142551 |
| rs10841006 | rs1363079  | rs17527941 | rs2427611 | rs4596103 | rs675608  | rs814753  |
| rs10843268 | rs1363342  | rs17529152 | rs2427622 | rs4596255 | rs6756831 | rs815333  |
| rs10843589 | rs1364516  | rs17529705 | rs2429308 | rs4600308 | rs6758173 | rs815611  |
| rs10845463 | rs1365239  | rs17531248 | rs2429944 | rs4602361 | rs6758386 | rs816040  |
| rs10845520 | rs1365247  | rs17531384 | rs2434123 | rs4602814 | rs6761161 | rs816186  |
| rs10848493 | rs136535   | rs17531523 | rs2434937 | rs4604455 | rs6761358 | rs817531  |
| rs10848847 | rs1365524  | rs1753480  | rs243507  | rs4604983 | rs6761372 | rs8176740 |
| rs10849118 | rs1365607  | rs17535234 | rs2436134 | rs4605146 | rs6761758 | rs817827  |
| rs10849464 | rs1365683  | rs17537018 | rs2436769 | rs4605866 | rs6762892 | rs817998  |
| rs10850475 | rs1366156  | rs17537644 | rs2436940 | rs4606356 | rs6763976 | rs8180040 |
| rs10852432 | rs1366595  | rs17538148 | rs2437271 | rs4606415 | rs6764088 | rs8181889 |
| rs10853347 | rs1366596  | rs17539208 | rs2438123 | rs4608205 | rs6764937 | rs8182084 |
| rs10853928 | rs136729   | rs17542983 | rs2438142 | rs4609127 | rs676527  | rs820809  |
| rs10857117 | rs1367406  | rs17543110 | rs2438225 | rs4612934 | rs6765537 | rs821237  |
| rs10857235 | rs13675    | rs17543368 | rs2438427 | rs4616280 | rs6766000 | rs822095  |
| rs10857585 | rs1368369  | rs17545004 | rs2438448 | rs4617240 | rs6766374 | rs823616  |

|            |           |            |           |           |           |          |
|------------|-----------|------------|-----------|-----------|-----------|----------|
| rs10857627 | rs1368970 | rs17545292 | rs2439321 | rs461863  | rs6767931 | rs823816 |
| rs10857920 | rs1369592 | rs17546503 | rs2439536 | rs4618952 | rs6768558 | rs824447 |
| rs10858544 | rs1369766 | rs17552102 | rs2440162 | rs4619875 | rs6769434 | rs825943 |
| rs10859579 | rs1370128 | rs1755513  | rs2444975 | rs4622161 | rs6772095 | rs827139 |
| rs10859742 | rs1370178 | rs17556469 | rs2445502 | rs4623233 | rs6772169 | rs828187 |
| rs10859799 | rs1370182 | rs17556606 | rs2445614 | rs4625411 | rs6772915 | rs828446 |
| rs10859824 | rs13706   | rs17558139 | rs2445718 | rs4625581 | rs6773879 | rs828461 |
| rs10859918 | rs1370686 | rs17559092 | rs2445887 | rs4625610 | rs6775562 | rs830995 |
| rs10860027 | rs1370808 | rs17561351 | rs244647  | rs4629317 | rs6775600 | rs831274 |
| rs10860134 | rs1371530 | rs17562125 | rs2446502 | rs462954  | rs6775904 | rs833676 |
| rs10864219 | rs1372080 | rs1756295  | rs2448709 | rs4633141 | rs6776046 | rs835123 |
| rs10865069 | rs1372635 | rs17563367 | rs244890  | rs463443  | rs6777235 | rs836110 |
| rs10865426 | rs1373102 | rs17563756 | rs244899  | rs4636306 | rs6778056 | rs836651 |
| rs10865567 | rs1373577 | rs17563917 | rs2449179 | rs463691  | rs6778117 | rs837835 |
| rs10865731 | rs1373853 | rs17564984 | rs2449340 | rs4637055 | rs6779094 | rs838090 |
| rs10866048 | rs1374387 | rs17565772 | rs2449347 | rs4637501 | rs6779254 | rs838307 |
| rs10867258 | rs1374762 | rs17568008 | rs245117  | rs4638857 | rs6780002 | rs838323 |
| rs10867821 | rs1374800 | rs17569206 | rs2453244 | rs4639051 | rs6780021 | rs838327 |
| rs10868220 | rs1375164 | rs17570271 | rs2453471 | rs4639193 | rs6781354 | rs838334 |
| rs10868811 | rs137520  | rs17571397 | rs2456455 | rs4639238 | rs6781540 | rs838705 |
| rs10868862 | rs1375526 | rs17573088 | rs2456467 | rs4640519 | rs6781844 | rs838709 |
| rs10869043 | rs13759   | rs17573145 | rs2457437 | rs4640621 | rs6782002 | rs838732 |
| rs10869746 | rs1378085 | rs17574098 | rs2458236 | rs4642311 | rs6782058 | rs838759 |
| rs10869869 | rs1378149 | rs17574276 | rs2458290 | rs464293  | rs6782072 | rs838919 |
| rs10869977 | rs1378506 | rs17574486 | rs245872  | rs4643089 | rs6782333 | rs840458 |
| rs10871590 | rs1378951 | rs17574500 | rs2460537 | rs465015  | rs6782845 | rs840952 |
| rs10871755 | rs1379881 | rs17574634 | rs2461127 | rs4650158 | rs6783116 | rs840958 |
| rs10872563 | rs1380094 | rs17575638 | rs2461489 | rs4650181 | rs6783764 | rs841158 |
| rs10873061 | rs1380469 | rs17575888 | rs2461507 | rs4651024 | rs6785702 | rs842779 |
| rs10874180 | rs1380504 | rs17576345 | rs2462961 | rs4652266 | rs6786612 | rs844312 |
| rs10875602 | rs1380642 | rs17577103 | rs2466025 | rs4652664 | rs6786886 | rs844380 |
| rs10875652 | rs1380716 | rs17577244 | rs2466072 | rs4653033 | rs6787391 | rs844990 |
| rs10875878 | rs1381251 | rs17577246 | rs2466084 | rs4653125 | rs6787506 | rs84578  |
| rs10878506 | rs1381608 | rs17577358 | rs2466440 | rs4653662 | rs6787710 | rs845966 |
| rs10878630 | rs1382042 | rs17577450 | rs2467590 | rs4654424 | rs678780  | rs847821 |
| rs10883655 | rs1382136 | rs17577586 | rs246783  | rs4655539 | rs6788254 | rs848013 |
| rs10883896 | rs1382500 | rs17578596 | rs2469622 | rs4655564 | rs678839  | rs849542 |
| rs10884374 | rs1382601 | rs17578954 | rs2469822 | rs4655599 | rs6789301 | rs849730 |
| rs10884387 | rs1382602 | rs1757947  | rs2470401 | rs4656256 | rs6790214 | rs850157 |
| rs10887860 | rs1382606 | rs17579720 | rs2470486 | rs465639  | rs6790445 | rs850303 |
| rs10887931 | rs1382663 | rs17579779 | rs2470666 | rs4657744 | rs6790499 | rs850307 |
| rs10888837 | rs1382675 | rs17579885 | rs2473182 | rs4658437 | rs679124  | rs851715 |
| rs10891629 | rs1382840 | rs17580088 | rs2475803 | rs4658843 | rs6791847 | rs852602 |
| rs10894965 | rs1382876 | rs17580590 | rs2478542 | rs4658905 | rs6792117 | rs852632 |
| rs10896574 | rs1384508 | rs17580906 | rs247897  | rs4659554 | rs6792907 | rs854102 |
| rs10897281 | rs138616  | rs17581268 | rs2479397 | rs4659623 | rs6793553 | rs854566 |
| rs10897807 | rs1386559 | rs17581671 | rs2480284 | rs4659995 | rs679370  | rs854568 |
| rs10898439 | rs1386852 | rs17582688 | rs2480736 | rs4660630 | rs6793841 | rs854809 |
| rs10898446 | rs1387019 | rs17582898 | rs2482096 | rs4660669 | rs6793923 | rs855123 |
| rs10899039 | rs1387657 | rs17583962 | rs248375  | rs4661162 | rs6795954 | rs855646 |
| rs10899313 | rs1389098 | rs17584390 | rs248432  | rs4661308 | rs6796105 | rs855737 |
| rs10899836 | rs1389560 | rs17584433 | rs2485212 | rs4661539 | rs6796475 | rs856077 |
| rs10901672 | rs1389838 | rs17584616 | rs2485213 | rs4661588 | rs6797692 | rs856154 |
| rs10903569 | rs1389840 | rs17584795 | rs2485219 | rs4663140 | rs6798250 | rs857464 |
| rs10904611 | rs1390129 | rs17585499 | rs2488255 | rs4663171 | rs6798450 | rs859    |
| rs10904956 | rs139077  | rs17586727 | rs2488778 | rs4663765 | rs6798711 | rs859050 |
| rs10905190 | rs1390789 | rs17587205 | rs2489214 | rs4665068 | rs679927  | rs859381 |
| rs10906264 | rs1391262 | rs1758738  | rs248990  | rs466551  | rs6800049 | rs860154 |
| rs10906734 | rs1391867 | rs17588454 | rs249117  | rs4665662 | rs6800790 | rs860796 |
| rs10907390 | rs1392866 | rs17588757 | rs2491236 | rs4666451 | rs6801052 | rs861319 |
| rs10908616 | rs1392887 | rs17589349 | rs2491278 | rs4666918 | rs6801346 | rs861506 |
| rs10912998 | rs1392892 | rs17590981 | rs249152  | rs466727  | rs6801771 | rs862227 |
| rs10915109 | rs1393009 | rs17592042 | rs2491857 | rs4669564 | rs6801866 | rs862481 |

|            |           |            |           |           |           |          |
|------------|-----------|------------|-----------|-----------|-----------|----------|
| rs10917430 | rs1393082 | rs17595317 | rs2492455 | rs467109  | rs6802490 | rs867354 |
| rs10918255 | rs1393942 | rs17595976 | rs2494014 | rs4671212 | rs6803630 | rs867365 |
| rs10918638 | rs1393957 | rs17597856 | rs2494440 | rs4671459 | rs6803889 | rs867538 |
| rs10922973 | rs1394079 | rs17598075 | rs2495012 | rs4671647 | rs6804148 | rs868823 |
| rs10923239 | rs1394456 | rs17599506 | rs2495972 | rs4672074 | rs680417  | rs869317 |
| rs10927406 | rs1394505 | rs17600375 | rs2496453 | rs4673728 | rs6806282 | rs869476 |
| rs10927973 | rs1394613 | rs17600549 | rs2498434 | rs4673823 | rs6806427 | rs870168 |
| rs10931067 | rs1394647 | rs17600732 | rs2498588 | rs4673990 | rs6807691 | rs871384 |
| rs10931768 | rs1394664 | rs17600836 | rs2498612 | rs4674107 | rs6808562 | rs871670 |
| rs10932793 | rs1395358 | rs17601323 | rs2498835 | rs4674122 | rs6809285 | rs871911 |
| rs10932859 | rs1395741 | rs17602002 | rs249917  | rs4674297 | rs6809408 | rs871988 |
| rs10934187 | rs1396197 | rs17604700 | rs2499648 | rs4675052 | rs6810146 | rs872372 |
| rs10934792 | rs1396205 | rs17605046 | rs2499658 | rs4675478 | rs6811192 | rs873363 |
| rs10934977 | rs1396714 | rs17608447 | rs2499714 | rs4675490 | rs6811901 | rs873764 |
| rs10935011 | rs13968   | rs17608485 | rs2501574 | rs4675874 | rs6814401 | rs874243 |
| rs10935975 | rs1396820 | rs17608966 | rs2501575 | rs4677065 | rs6815614 | rs874268 |
| rs10936770 | rs1396829 | rs1760961  | rs250168  | rs4677142 | rs6815830 | rs874889 |
| rs10938481 | rs1397442 | rs17610130 | rs2501916 | rs4677728 | rs6816498 | rs875379 |
| rs10938804 | rs1397481 | rs17610830 | rs2502521 | rs4677735 | rs6818900 | rs875391 |
| rs10939643 | rs1397588 | rs17613182 | rs2502806 | rs4677962 | rs6819770 | rs875415 |
| rs10940495 | rs1398599 | rs17613607 | rs2503638 | rs4677964 | rs6819860 | rs875500 |
| rs10943442 | rs139932  | rs17613743 | rs250429  | rs4678192 | rs6820501 | rs876081 |
| rs10943997 | rs1399614 | rs17614208 | rs2505779 | rs4678275 | rs682133  | rs876501 |
| rs10944481 | rs1400397 | rs17614449 | rs2505972 | rs4678917 | rs6822121 | rs876814 |
| rs10944860 | rs1400882 | rs17614940 | rs2508803 | rs4679133 | rs6822653 | rs877034 |
| rs10946428 | rs1400902 | rs17615079 | rs2509175 | rs4679484 | rs6823493 | rs877270 |
| rs10946494 | rs1401582 | rs17615132 | rs2510506 | rs4679616 | rs6824507 | rs877271 |
| rs10946610 | rs1402121 | rs17615661 | rs2510694 | rs4679621 | rs6824735 | rs878781 |
| rs10948664 | rs1402126 | rs17619307 | rs2510957 | rs4681336 | rs6825212 | rs878830 |
| rs10949800 | rs14024   | rs17619966 | rs2511090 | rs4681898 | rs6827550 | rs879012 |
| rs10952137 | rs1402867 | rs17620655 | rs2511212 | rs468211  | rs6828389 | rs879573 |
| rs10952787 | rs1403826 | rs17620740 | rs2511660 | rs4683398 | rs6828858 | rs880014 |
| rs10954495 | rs1404567 | rs17620843 | rs2512245 | rs4683458 | rs6829252 | rs880385 |
| rs10955120 | rs1404807 | rs17621065 | rs2512319 | rs4683681 | rs6830722 | rs881262 |
| rs10956364 | rs1405472 | rs17621117 | rs2512424 | rs4683750 | rs6830795 | rs881997 |
| rs10956551 | rs1405805 | rs17621832 | rs2513399 | rs4683753 | rs6831083 | rs882406 |
| rs10957071 | rs1406095 | rs17622419 | rs2513402 | rs4684602 | rs683142  | rs882422 |
| rs10957225 | rs1406549 | rs17622439 | rs2513663 | rs4685320 | rs6831973 | rs883313 |
| rs10957308 | rs1406929 | rs17622971 | rs2513993 | rs4685672 | rs6832935 | rs883399 |
| rs10958135 | rs1409577 | rs17623153 | rs251426  | rs4685814 | rs6833877 | rs884166 |
| rs10960798 | rs1410091 | rs17623364 | rs2514552 | rs4685931 | rs6835033 | rs884995 |
| rs10965866 | rs1410588 | rs17623434 | rs2515366 | rs4686326 | rs6835518 | rs885582 |
| rs10966833 | rs1411128 | rs17623732 | rs2518322 | rs4686331 | rs6836406 | rs885636 |
| rs10967470 | rs1411433 | rs17623746 | rs2519085 | rs4686742 | rs6837016 | rs885846 |
| rs10967935 | rs1411434 | rs17624027 | rs251990  | rs4687333 | rs6837118 | rs886132 |
| rs10969362 | rs1411461 | rs17624218 | rs2520492 | rs4688129 | rs6839627 | rs886337 |
| rs10970393 | rs1411876 | rs17624429 | rs2522343 | rs4688398 | rs6840603 | rs886431 |
| rs10972048 | rs1412115 | rs17625382 | rs2523746 | rs468957  | rs6840845 | rs887000 |
| rs10973533 | rs1412249 | rs17626512 | rs2524201 | rs4689713 | rs6841316 | rs887193 |
| rs10973536 | rs1412252 | rs17626752 | rs2526043 | rs4689848 | rs684180  | rs887200 |
| rs10973580 | rs1412461 | rs17628405 | rs252610  | rs4691385 | rs6841855 | rs887802 |
| rs10973635 | rs1412515 | rs17628746 | rs2528681 | rs4692029 | rs6841948 | rs888975 |
| rs10974487 | rs1412517 | rs17628870 | rs2532562 | rs4692163 | rs6843136 | rs889129 |
| rs10980616 | rs1412859 | rs17629173 | rs253438  | rs4693005 | rs6843196 | rs889312 |
| rs10980639 | rs1414102 | rs17629536 | rs2540871 | rs4693941 | rs6843640 | rs891013 |
| rs10980643 | rs1414474 | rs17629774 | rs2540879 | rs4693976 | rs684407  | rs891297 |
| rs10983617 | rs1415385 | rs17631394 | rs2542037 | rs4695895 | rs684503  | rs891417 |
| rs10984028 | rs1415458 | rs17631516 | rs2542575 | rs4696758 | rs6845147 | rs891666 |
| rs10984446 | rs1415491 | rs17632029 | rs2542741 | rs4696998 | rs6845256 | rs892024 |
| rs10986358 | rs1415612 | rs1763212  | rs2544310 | rs4697059 | rs6847975 | rs892152 |
| rs10988759 | rs1416105 | rs17632146 | rs2546056 | rs4697178 | rs6848268 | rs893252 |
| rs10992039 | rs1416313 | rs17632187 | rs2546626 | rs4698242 | rs6849193 | rs894656 |
| rs10993596 | rs1416405 | rs17632459 | rs2546838 | rs4699289 | rs6849689 | rs894910 |

|            |           |            |           |           |           |          |
|------------|-----------|------------|-----------|-----------|-----------|----------|
| rs10995661 | rs1416453 | rs17632540 | rs2549160 | rs4699515 | rs6852892 | rs895086 |
| rs10999565 | rs1416472 | rs17632688 | rs2550620 | rs4700518 | rs6853364 | rs895828 |
| rs11000459 | rs1417604 | rs17632773 | rs2551044 | rs4702561 | rs6853889 | rs895924 |
| rs11001111 | rs1417731 | rs17633079 | rs255105  | rs4702677 | rs6853928 | rs896041 |
| rs1100138  | rs1417845 | rs17633824 | rs255115  | rs4702916 | rs6854335 | rs896542 |
| rs11003879 | rs1418884 | rs17634150 | rs255153  | rs4703905 | rs685478  | rs897322 |
| rs11004104 | rs1420683 | rs17634771 | rs255351  | rs4704464 | rs6855142 | rs898034 |
| rs11004413 | rs1420816 | rs17635336 | rs2553648 | rs470498  | rs6856185 | rs898200 |
| rs11007241 | rs1420986 | rs17635409 | rs2555240 | rs4705916 | rs6857914 | rs899844 |
| rs11008213 | rs1421018 | rs17636088 | rs255969  | rs4706020 | rs6857926 | rs899937 |
| rs11009788 | rs1421503 | rs17636812 | rs2560289 | rs4706051 | rs685815  | rs901834 |
| rs11010520 | rs1421617 | rs17637290 | rs2560308 | rs4706947 | rs685912  | rs901933 |
| rs11010975 | rs1422606 | rs17637793 | rs2560314 | rs4708281 | rs6860273 | rs902246 |
| rs11012099 | rs1422882 | rs17637825 | rs256289  | rs4709370 | rs6861285 | rs902385 |
| rs11013938 | rs1422893 | rs17641482 | rs2564483 | rs4710834 | rs6861345 | rs903222 |
| rs11014145 | rs1423352 | rs17641689 | rs2564913 | rs4710899 | rs6861416 | rs903549 |
| rs11014393 | rs1423629 | rs17642128 | rs2565045 | rs4711082 | rs6861592 | rs904460 |
| rs11015588 | rs1423851 | rs17644348 | rs2565666 | rs4711827 | rs6861766 | rs904462 |
| rs1101752  | rs1423910 | rs17644822 | rs256596  | rs4712005 | rs6863070 | rs904510 |
| rs11021425 | rs1424520 | rs17644967 | rs2567539 | rs4712009 | rs6863933 | rs904632 |
| rs11022679 | rs1424787 | rs17646773 | rs2567661 | rs4712584 | rs6866416 | rs905217 |
| rs1102478  | rs1426100 | rs1764766  | rs2569436 | rs4712961 | rs6867551 | rs905499 |
| rs11025088 | rs1426790 | rs17649655 | rs2569474 | rs4713580 | rs6868518 | rs906754 |
| rs11025773 | rs1427088 | rs17649743 | rs256969  | rs4714165 | rs6869207 | rs906783 |
| rs11028988 | rs1427604 | rs17650322 | rs256980  | rs4714198 | rs6872031 | rs907203 |
| rs11033622 | rs1427828 | rs17652078 | rs2569806 | rs4714724 | rs6872908 | rs907946 |
| rs11043498 | rs1428023 | rs17653687 | rs2570942 | rs471488  | rs6873471 | rs908295 |
| rs11047486 | rs1428514 | rs17653815 | rs2572357 | rs4715976 | rs6873656 | rs908296 |
| rs1104769  | rs1428739 | rs17653846 | rs25754   | rs4716085 | rs6874109 | rs909116 |
| rs11047775 | rs1428952 | rs17655606 | rs2575721 | rs471661  | rs6874327 | rs909723 |
| rs11048607 | rs1430054 | rs17656010 | rs2579966 | rs4717047 | rs6874443 | rs910912 |
| rs11049715 | rs1430543 | rs17657025 | rs2579968 | rs4718906 | rs6874826 | rs911251 |
| rs11050322 | rs1430551 | rs17658000 | rs25810   | rs4720913 | rs6874954 | rs911582 |
| rs1105218  | rs1430794 | rs17658232 | rs2581125 | rs4722193 | rs687559  | rs911817 |
| rs11054953 | rs1431010 | rs17658809 | rs2581626 | rs4723604 | rs6876032 | rs912668 |
| rs11058439 | rs1432202 | rs17661922 | rs2582814 | rs4725395 | rs6876148 | rs912794 |
| rs1105883  | rs1432553 | rs17662089 | rs2583831 | rs4725500 | rs6877    | rs912796 |
| rs1106122  | rs1433477 | rs17662529 | rs2584162 | rs4727005 | rs6879021 | rs913863 |
| rs11061787 | rs1434390 | rs17662568 | rs2584164 | rs4727706 | rs688     | rs914278 |
| rs11062026 | rs1434814 | rs17662685 | rs2584448 | rs472873  | rs6881530 | rs915848 |
| rs11062724 | rs1435972 | rs17663377 | rs2585248 | rs4729346 | rs6881657 | rs917188 |
| rs11063417 | rs1436094 | rs17663626 | rs2585758 | rs4729352 | rs6881804 | rs917502 |
| rs11063482 | rs1436282 | rs17663994 | rs2586514 | rs4729436 | rs6882732 | rs917908 |
| rs1106388  | rs1436283 | rs17664124 | rs2586577 | rs4731243 | rs6882884 | rs918077 |
| rs11066769 | rs1436345 | rs17664411 | rs2586947 | rs4731861 | rs6882964 | rs918207 |
| rs11067177 | rs143635  | rs17665064 | rs2586954 | rs4732037 | rs6882984 | rs918553 |
| rs11067283 | rs1436407 | rs17665143 | rs258789  | rs4732060 | rs6883951 | rs918908 |
| rs11067459 | rs1436434 | rs17665621 | rs2588808 | rs4732365 | rs6884206 | rs918979 |
| rs110675   | rs1437434 | rs17666291 | rs2589155 | rs473267  | rs6886136 | rs919353 |
| rs11068019 | rs1437917 | rs17666330 | rs2589450 | rs4732688 | rs6889798 | rs919541 |
| rs11069349 | rs1438339 | rs17666612 | rs2589864 | rs4732936 | rs6890391 | rs919590 |
| rs1107342  | rs1438367 | rs17670431 | rs2590762 | rs4733308 | rs6890696 | rs919681 |
| rs11074094 | rs1438625 | rs17670574 | rs259122  | rs4733540 | rs6891783 | rs919769 |
| rs11074961 | rs1438733 | rs17670847 | rs259126  | rs4734087 | rs6892721 | rs920159 |
| rs11075954 | rs1438817 | rs1767103  | rs2592297 | rs4734367 | rs6894183 | rs921364 |
| rs11076151 | rs1439104 | rs17671037 | rs2592828 | rs4734695 | rs6894567 | rs921532 |
| rs11077039 | rs1439483 | rs17673138 | rs2595110 | rs4735362 | rs6895130 | rs921739 |
| rs11077614 | rs1440881 | rs17674036 | rs2597579 | rs4735772 | rs6896567 | rs921915 |
| rs11078708 | rs1441005 | rs17674480 | rs2598470 | rs4735890 | rs6896574 | rs922445 |
| rs1107895  | rs1441124 | rs17674590 | rs2599435 | rs4736204 | rs6896703 | rs923422 |
| rs11079228 | rs1441300 | rs17674910 | rs259967  | rs4736519 | rs6899208 | rs923467 |
| rs11079339 | rs1441882 | rs17676297 | rs259976  | rs4736640 | rs6900251 | rs923654 |
| rs11079873 | rs1441973 | rs17676814 | rs26000   | rs4737739 | rs6901567 | rs923772 |

|            |           |            |           |           |           |           |
|------------|-----------|------------|-----------|-----------|-----------|-----------|
| rs1108016  | rs1442608 | rs17676833 | rs2601760 | rs4738700 | rs6901639 | rs923837  |
| rs11080417 | rs1444571 | rs17677454 | rs2601881 | rs4739907 | rs6902618 | rs924481  |
| rs1108048  | rs1444613 | rs17677520 | rs2604298 | rs4740123 | rs6902635 | rs925042  |
| rs11081271 | rs1444756 | rs17679120 | rs2604496 | rs4740544 | rs6903939 | rs9257825 |
| rs11081751 | rs1445516 | rs17679237 | rs2605082 | rs474075  | rs6904275 | rs9257889 |
| rs11084088 | rs1445779 | rs17680152 | rs2605232 | rs4741228 | rs6905698 | rs926073  |
| rs11089871 | rs1445998 | rs17680796 | rs2605492 | rs4741546 | rs6906487 | rs927155  |
| rs1109169  | rs1446123 | rs176809   | rs2607059 | rs4742711 | rs6908315 | rs927204  |
| rs1109413  | rs1446977 | rs17681620 | rs2608077 | rs4742988 | rs690860  | rs927254  |
| rs11095832 | rs1447051 | rs17681801 | rs260818  | rs4743024 | rs6909102 | rs9277542 |
| rs11096556 | rs1447201 | rs17682153 | rs2608210 | rs4743072 | rs6909231 | rs9283864 |
| rs11097740 | rs1449204 | rs17682318 | rs2608280 | rs4743175 | rs6910737 | rs9284788 |
| rs1109992  | rs1450632 | rs17682515 | rs2608816 | rs4743702 | rs6913516 | rs9285235 |
| rs11100152 | rs1450954 | rs17683064 | rs2608819 | rs4744097 | rs6915728 | rs9285863 |
| rs1110116  | rs1451036 | rs17683407 | rs260969  | rs4744239 | rs6916452 | rs9287664 |
| rs11102233 | rs1451484 | rs17683539 | rs261053  | rs4744800 | rs6916951 | rs9287852 |
| rs11102731 | rs1451486 | rs17685146 | rs2611021 | rs4745013 | rs691797  | rs9288014 |
| rs11103275 | rs1451610 | rs17686345 | rs2611043 | rs4745520 | rs6919392 | rs9288593 |
| rs11105273 | rs1452438 | rs17686489 | rs2612015 | rs4745521 | rs692009  | rs9288594 |
| rs11105731 | rs1452630 | rs17687610 | rs2612571 | rs4745779 | rs6921435 | rs9288801 |
| rs11106313 | rs1453798 | rs17687639 | rs2613339 | rs4746302 | rs6921519 | rs9289406 |
| rs11107973 | rs1454001 | rs17687844 | rs2613573 | rs4746308 | rs6922780 | rs9290474 |
| rs11108609 | rs1454162 | rs17688121 | rs2613596 | rs4746396 | rs692309  | rs9290769 |
| rs11109244 | rs1454527 | rs17688572 | rs2613766 | rs4747793 | rs6924188 | rs929152  |
| rs1111481  | rs1454765 | rs17691558 | rs2613996 | rs4748437 | rs692512  | rs9291659 |
| rs11116315 | rs1455672 | rs17693414 | rs2615143 | rs4748570 | rs692674  | rs9291689 |
| rs11116512 | rs1456154 | rs17693854 | rs2615919 | rs4749252 | rs6927989 | rs9291814 |
| rs11118054 | rs1456294 | rs17694070 | rs2616262 | rs4750004 | rs693     | rs9292086 |
| rs11118063 | rs1456444 | rs17694713 | rs2616487 | rs4750232 | rs6933642 | rs9292668 |
| rs11119256 | rs1456737 | rs17695268 | rs2618648 | rs4750457 | rs6933891 | rs929385  |
| rs1111967  | rs1457822 | rs17695537 | rs2622761 | rs4750525 | rs6934183 | rs929395  |
| rs1112269  | rs1458762 | rs17695643 | rs262342  | rs4750872 | rs693439  | rs9294997 |
| rs11125668 | rs1459215 | rs17695788 | rs2623997 | rs4751239 | rs693442  | rs9295420 |
| rs11126740 | rs1459259 | rs17696032 | rs2624847 | rs4751252 | rs6936326 | rs9295844 |
| rs11127026 | rs1460359 | rs17696554 | rs2626413 | rs4751908 | rs693642  | rs9296095 |
| rs11130016 | rs1460769 | rs17696842 | rs262714  | rs475210  | rs6936999 | rs9296268 |
| rs11130188 | rs1460806 | rs17697206 | rs2627468 | rs4752700 | rs6937714 | rs9296534 |
| rs11130692 | rs1462677 | rs17698135 | rs2628210 | rs4753262 | rs6943291 | rs9296669 |
| rs11130728 | rs1463424 | rs17698900 | rs262865  | rs4754521 | rs6943382 | rs9296670 |
| rs1113098  | rs1464144 | rs17699273 | rs2629396 | rs4754604 | rs6943386 | rs929711  |
| rs11133935 | rs1465624 | rs17699358 | rs2631946 | rs475709  | rs6944389 | rs9297954 |
| rs11133976 | rs1467809 | rs17700763 | rs2632574 | rs4757794 | rs694514  | rs9298162 |
| rs11134138 | rs1467857 | rs17702304 | rs2632594 | rs4757893 | rs6946126 | rs9298877 |
| rs11135108 | rs1468270 | rs17703851 | rs2632698 | rs4758239 | rs6946785 | rs9300194 |
| rs11135127 | rs1468279 | rs17705195 | rs263271  | rs4758350 | rs6946957 | rs9300373 |
| rs11135684 | rs1468412 | rs17705416 | rs2632710 | rs4758651 | rs6947134 | rs9303397 |
| rs11136971 | rs1469329 | rs17705633 | rs2635429 | rs4759296 | rs6947821 | rs930342  |
| rs11137820 | rs1469333 | rs17706060 | rs2636256 | rs4759647 | rs6949410 | rs9303589 |
| rs11137862 | rs1469539 | rs17706699 | rs2636773 | rs4760088 | rs694975  | rs9303715 |
| rs11138091 | rs1469856 | rs17710163 | rs2637360 | rs4760496 | rs695202  | rs9303777 |
| rs11139400 | rs1470414 | rs17712237 | rs2637648 | rs4760674 | rs695318  | rs9304337 |
| rs11142398 | rs1470672 | rs17713225 | rs2638133 | rs4761504 | rs6955887 | rs9304552 |
| rs11142521 | rs1470994 | rs1771523  | rs2638145 | rs4761702 | rs6956327 | rs9304595 |
| rs11142567 | rs1471271 | rs1771716  | rs2638656 | rs4762075 | rs6956610 | rs9304688 |
| rs11142578 | rs1471379 | rs17717934 | rs263928  | rs4762584 | rs6956726 | rs930544  |
| rs11142847 | rs1471429 | rs17718923 | rs2640200 | rs4763707 | rs6957252 | rs9306242 |
| rs11142892 | rs1472224 | rs17719594 | rs264041  | rs4763948 | rs6957565 | rs9306469 |
| rs11143514 | rs1472779 | rs17719756 | rs2640492 | rs4764538 | rs6957965 | rs9306906 |
| rs11144511 | rs1473178 | rs17720559 | rs2640867 | rs4764597 | rs6958317 | rs9308430 |
| rs11144739 | rs1475301 | rs17721217 | rs2642128 | rs4764630 | rs6959554 | rs9309077 |
| rs11145093 | rs1476162 | rs17722675 | rs2642609 | rs4764678 | rs696172  | rs9309126 |
| rs1114629  | rs1477684 | rs17722972 | rs2642820 | rs4764768 | rs6961921 | rs9309247 |
| rs11147428 | rs1477767 | rs17724836 | rs264346  | rs4765822 | rs696197  | rs9309386 |

|            |           |            |           |           |           |           |
|------------|-----------|------------|-----------|-----------|-----------|-----------|
| rs11149841 | rs1478364 | rs17725070 | rs2643723 | rs4766108 | rs6962965 | rs9310422 |
| rs11150722 | rs1478645 | rs17725617 | rs26440   | rs476651  | rs6964190 | rs9310823 |
| rs11151857 | rs1478978 | rs17725793 | rs2644604 | rs4766886 | rs6966405 | rs9310905 |
| rs1115217  | rs1478984 | rs17726037 | rs2646847 | rs4766888 | rs6966615 | rs9311138 |
| rs11154621 | rs1479122 | rs17728492 | rs264724  | rs4766951 | rs696720  | rs9311277 |
| rs11155542 | rs1480020 | rs17729097 | rs2647710 | rs4767654 | rs6968288 | rs9311474 |
| rs1115646  | rs1480106 | rs17729412 | rs2648070 | rs4767743 | rs6968491 | rs9311749 |
| rs1115728  | rs1480164 | rs17730406 | rs2648545 | rs4767751 | rs696866  | rs9312489 |
| rs11158809 | rs1481911 | rs17732457 | rs26492   | rs4769241 | rs6968800 | rs9313204 |
| rs11159269 | rs1481992 | rs17732475 | rs26500   | rs4770714 | rs6970472 | rs9313968 |
| rs11159294 | rs1482929 | rs17732513 | rs265038  | rs4771047 | rs6970924 | rs9314133 |
| rs11159809 | rs1482940 | rs17733505 | rs265153  | rs4771280 | rs697114  | rs9314355 |
| rs11159934 | rs1483246 | rs17734465 | rs2654010 | rs4772260 | rs6971383 | rs9314677 |
| rs11160222 | rs1483908 | rs17735048 | rs2656263 | rs4772442 | rs6973420 | rs9315298 |
| rs11161304 | rs1483971 | rs17735063 | rs2657162 | rs4772493 | rs6973599 | rs9315543 |
| rs11162183 | rs1484398 | rs17735924 | rs26576   | rs4772641 | rs6973986 | rs9315688 |
| rs11162311 | rs1484828 | rs17736964 | rs2658736 | rs4772860 | rs6974619 | rs931587  |
| rs11164838 | rs1484875 | rs17738513 | rs2660730 | rs4773319 | rs6974767 | rs9316676 |
| rs1116490  | rs1485134 | rs17738824 | rs2661070 | rs4773899 | rs6975741 | rs9316743 |
| rs11167172 | rs1486206 | rs17738836 | rs2661983 | rs4774402 | rs6975950 | rs9317629 |
| rs11167576 | rs1487565 | rs17740340 | rs2665648 | rs4775391 | rs697614  | rs9317638 |
| rs11171657 | rs1488241 | rs17740743 | rs266587  | rs4775408 | rs6976155 | rs9317874 |
| rs1117439  | rs1488679 | rs17741331 | rs2666365 | rs4776188 | rs6976431 | rs9317965 |
| rs11174698 | rs1488691 | rs17742271 | rs266767  | rs4776200 | rs6976733 | rs9318026 |
| rs11175944 | rs1489480 | rs17743380 | rs2670104 | rs4776449 | rs6980105 | rs9318323 |
| rs11176031 | rs1489486 | rs17743658 | rs2670944 | rs477756  | rs6980121 | rs931874  |
| rs11176517 | rs1491465 | rs17744075 | rs2670947 | rs4777792 | rs6981174 | rs9319013 |
| rs1117662  | rs1491841 | rs17744768 | rs267122  | rs4778137 | rs6981433 | rs9319323 |
| rs11176750 | rs1491881 | rs17744903 | rs267174  | rs4778818 | rs6981944 | rs9319330 |
| rs11180344 | rs1492179 | rs17744957 | rs2672843 | rs4778905 | rs6982484 | rs9319741 |
| rs11180828 | rs1495374 | rs17746517 | rs2673661 | rs4780281 | rs6985209 | rs9320330 |
| rs11185082 | rs1495716 | rs17746902 | rs267381  | rs4780309 | rs6987013 | rs932096  |
| rs11188795 | rs1495771 | rs17747662 | rs2675607 | rs478112  | rs698853  | rs9322330 |
| rs11189558 | rs1495904 | rs17749058 | rs2676093 | rs4781550 | rs6989076 | rs9322419 |
| rs11189602 | rs1495908 | rs17749103 | rs2676289 | rs4783119 | rs6989757 | rs9323016 |
| rs11192819 | rs1496108 | rs17750595 | rs2677275 | rs4783863 | rs6989976 | rs9323287 |
| rs11192942 | rs1497590 | rs17750689 | rs2678286 | rs4784165 | rs6991612 | rs9323327 |
| rs11193122 | rs1497628 | rs17750824 | rs2679099 | rs4784274 | rs6991681 | rs932376  |
| rs11195140 | rs1498217 | rs17751677 | rs2680669 | rs4784373 | rs6993754 | rs9323803 |
| rs1119662  | rs1498290 | rs17751931 | rs2681065 | rs4785334 | rs6994667 | rs9324014 |
| rs11200686 | rs1498553 | rs17752020 | rs2683105 | rs4786119 | rs6994939 | rs9324644 |
| rs11203277 | rs1498599 | rs17752444 | rs2683173 | rs478692  | rs6996158 | rs9325073 |
| rs11203585 | rs1499014 | rs17752784 | rs2683236 | rs478739  | rs6998470 | rs9325599 |
| rs11208958 | rs1499110 | rs17753066 | rs2683571 | rs4787812 | rs7000195 | rs9328058 |
| rs11209584 | rs1499810 | rs17753075 | rs2684840 | rs4788621 | rs7001463 | rs9328758 |
| rs11210232 | rs1499881 | rs17753632 | rs268566  | rs4788887 | rs700147  | rs932878  |
| rs11210463 | rs1500169 | rs17755520 | rs2687558 | rs4788901 | rs7002343 | rs9328844 |
| rs11210859 | rs1500642 | rs17755917 | rs2687834 | rs4789010 | rs700469  | rs9329070 |
| rs11211073 | rs1501067 | rs17756228 | rs2688700 | rs4789421 | rs7006223 | rs933222  |
| rs11212733 | rs1501482 | rs17756312 | rs2690294 | rs4789596 | rs7007639 | rs9332386 |
| rs11215001 | rs1502641 | rs17756618 | rs2691439 | rs4789606 | rs7009361 | rs9332387 |
| rs11215025 | rs1502999 | rs17757180 | rs269191  | rs4789642 | rs7009985 | rs9332389 |
| rs11217506 | rs1503465 | rs17758391 | rs2692533 | rs4790288 | rs7010802 | rs9332390 |
| rs11218100 | rs1504719 | rs17758573 | rs2700888 | rs4790572 | rs7011863 | rs9332392 |
| rs1121926  | rs1505463 | rs17759796 | rs2701010 | rs4791035 | rs7012024 | rs9332393 |
| rs1122044  | rs1505762 | rs17760152 | rs2701089 | rs4791155 | rs7012595 | rs9332399 |
| rs11221224 | rs1506418 | rs17760275 | rs2702636 | rs4791765 | rs701281  | rs9332401 |
| rs1122453  | rs1506456 | rs17760780 | rs2703926 | rs4791834 | rs7013883 | rs9332402 |
| rs11224633 | rs1506488 | rs17761406 | rs2706880 | rs4791902 | rs7014503 | rs9332403 |
| rs11225262 | rs1506580 | rs17762392 | rs2707271 | rs4791906 | rs7016682 | rs9332404 |
| rs11226095 | rs1506746 | rs17762856 | rs270765  | rs4792047 | rs7016786 | rs9332405 |
| rs11226679 | rs1506878 | rs17763056 | rs2709928 | rs4792157 | rs701744  | rs9332406 |
| rs11228148 | rs1506950 | rs17763803 | rs2713753 | rs4792321 | rs7017739 | rs9332407 |



|            |           |            |           |           |           |           |
|------------|-----------|------------|-----------|-----------|-----------|-----------|
| rs11235127 | rs1507435 | rs17764972 | rs27152   | rs4792953 | rs701910  | rs9332408 |
| rs11237691 | rs1507456 | rs17765290 | rs2715368 | rs4793324 | rs7021930 | rs9332409 |
| rs11238908 | rs1507608 | rs17765618 | rs2715374 | rs4794555 | rs7022582 | rs9332410 |
| rs11240239 | rs15082   | rs17766128 | rs2716555 | rs4794672 | rs7024182 | rs9332411 |
| rs11241256 | rs1508227 | rs17766292 | rs2716809 | rs4794872 | rs7024617 | rs9332412 |
| rs11242460 | rs1508289 | rs17766633 | rs2717730 | rs479578  | rs7024926 | rs9332413 |
| rs11242497 | rs150928  | rs17767370 | rs2719142 | rs4796238 | rs7025529 | rs9332414 |
| rs11244550 | rs1509966 | rs17767568 | rs2719336 | rs4797234 | rs7025892 | rs9332415 |
| rs1124814  | rs1510158 | rs17768421 | rs2719367 | rs4797252 | rs7026182 | rs9332416 |
| rs11248496 | rs1510976 | rs17769587 | rs271962  | rs4797351 | rs702689  | rs9332417 |
| rs11249991 | rs1511241 | rs17770675 | rs2720719 | rs4797992 | rs7027006 | rs9332418 |
| rs11251048 | rs1511682 | rs17770871 | rs2722270 | rs4798720 | rs7030727 | rs9332419 |
| rs11253256 | rs1511763 | rs17770965 | rs2723587 | rs4799230 | rs7030959 | rs9332420 |
| rs11253587 | rs1512821 | rs17771656 | rs2724190 | rs4799318 | rs703174  | rs9332421 |
| rs11254646 | rs1512890 | rs17772431 | rs2724385 | rs4799997 | rs7031744 | rs9332422 |
| rs1125528  | rs1513162 | rs17772811 | rs2725627 | rs4800467 | rs7032301 | rs9332423 |
| rs11257470 | rs1513380 | rs17773041 | rs2727588 | rs4800634 | rs7032883 | rs9332424 |
| rs1125808  | rs1513436 | rs17773550 | rs2730081 | rs4800637 | rs7033627 | rs9332425 |
| rs1125878  | rs1514659 | rs17773666 | rs2730082 | rs4802074 | rs7034414 | rs9332426 |
| rs11261301 | rs1514931 | rs17773903 | rs273160  | rs4802474 | rs7034563 | rs9332427 |
| rs11264498 | rs1515442 | rs17774058 | rs2733282 | rs4802787 | rs7036039 | rs9332428 |
| rs11264618 | rs1516342 | rs17774555 | rs2733423 | rs4803294 | rs7038736 | rs9332429 |
| rs1126483  | rs1516350 | rs1777457  | rs273351  | rs4803342 | rs7039374 | rs9332430 |
| rs11265859 | rs1516407 | rs17775314 | rs273415  | rs4805025 | rs7041297 | rs9332431 |
| rs1130011  | rs1516622 | rs17775504 | rs273442  | rs4805905 | rs704219  | rs9332432 |
| rs1137100  | rs1516807 | rs17776970 | rs2738545 | rs4806245 | rs7042655 | rs9332433 |
| rs1137101  | rs1517162 | rs17779022 | rs27405   | rs4806332 | rs7042667 | rs9332434 |
| rs1137895  | rs1517577 | rs17779115 | rs2741159 | rs4807521 | rs7042763 | rs9332435 |
| rs11443    | rs1518445 | rs1778041  | rs2741370 | rs480836  | rs7042904 | rs9332436 |
| rs1144953  | rs1518726 | rs17780614 | rs2742635 | rs4808464 | rs7043585 | rs9332437 |
| rs1144959  | rs1519320 | rs17782613 | rs274302  | rs4808631 | rs7047051 | rs9332441 |
| rs114509   | rs1520274 | rs17783044 | rs2743312 | rs4808801 | rs7048314 | rs9332443 |
| rs1146337  | rs1520840 | rs17783081 | rs2743691 | rs480978  | rs7048604 | rs9332444 |
| rs1147816  | rs152088  | rs17783087 | rs27446   | rs481018  | rs7056974 | rs9332445 |
| rs1149356  | rs1521191 | rs17783207 | rs2744741 | rs4810264 | rs7058787 | rs9332446 |
| rs1150226  | rs1521462 | rs17784363 | rs2745485 | rs4810502 | rs705894  | rs9332447 |
| rs11503014 | rs1521792 | rs17784417 | rs2746479 | rs4811505 | rs7061261 | rs9332448 |
| rs1150388  | rs1522219 | rs17784729 | rs2747666 | rs4811777 | rs706349  | rs9332449 |
| rs1150418  | rs1522250 | rs17784795 | rs2747682 | rs4812400 | rs7063823 | rs9332450 |
| rs1150625  | rs1523233 | rs17785982 | rs2748663 | rs4812717 | rs7064630 | rs9332451 |
| rs11525966 | rs1523347 | rs17786254 | rs2750454 | rs4813293 | rs7070141 | rs9332452 |
| rs1152774  | rs1523751 | rs17786532 | rs2753413 | rs4813514 | rs7070614 | rs9332453 |
| rs11545941 | rs1523890 | rs17790348 | rs275360  | rs4813723 | rs7071006 | rs9332454 |
| rs11547236 | rs1523903 | rs17790357 | rs275826  | rs4814783 | rs7071267 | rs9332455 |
| rs11547827 | rs152528  | rs17790977 | rs275831  | rs4815390 | rs7072068 | rs9332456 |
| rs1156574  | rs1525980 | rs17791025 | rs2758775 | rs4820279 | rs7072329 | rs9332457 |
| rs11571082 | rs1526090 | rs17792599 | rs2760101 | rs4820431 | rs7073158 | rs9332458 |
| rs1157602  | rs1526112 | rs17792804 | rs2764268 | rs4820756 | rs7074341 | rs9332459 |
| rs11577538 | rs1526114 | rs17793970 | rs2764916 | rs4821176 | rs707555  | rs9332461 |
| rs11578747 | rs1526755 | rs17794794 | rs2766005 | rs482282  | rs7075861 | rs9332462 |
| rs11581272 | rs1527263 | rs17795101 | rs276695  | rs4823135 | rs7076318 | rs9332463 |
| rs11581979 | rs1527362 | rs17795478 | rs2769680 | rs4823723 | rs7076580 | rs9332464 |
| rs11586743 | rs1527481 | rs17796741 | rs2773822 | rs482708  | rs7076662 | rs9332465 |
| rs11587159 | rs1527878 | rs17797119 | rs2775279 | rs4827286 | rs7079155 | rs9332466 |
| rs11587215 | rs1529590 | rs17797721 | rs2777494 | rs4829104 | rs707983  | rs9332467 |
| rs11588295 | rs1530045 | rs17797837 | rs2777860 | rs4829186 | rs707991  | rs9332468 |
| rs11589684 | rs1530146 | rs17797976 | rs2778944 | rs4830301 | rs7080187 | rs9332469 |
| rs11590405 | rs153088  | rs17800819 | rs2779285 | rs4831661 | rs7080438 | rs9332470 |
| rs1159143  | rs1531210 | rs17801823 | rs2779361 | rs4832242 | rs708078  | rs9332471 |
| rs11593311 | rs1531658 | rs17802213 | rs2782917 | rs4832404 | rs7081530 | rs9332472 |
| rs11594365 | rs1531842 | rs17802282 | rs2783061 | rs4832524 | rs7081796 | rs9341715 |
| rs11597573 | rs1532196 | rs1780314  | rs2786718 | rs4833704 | rs708255  | rs934308  |
| rs11598270 | rs1532471 | rs1780315  | rs2787487 | rs4835514 | rs7082609 | rs9345059 |

|            |           |            |           |           |           |           |
|------------|-----------|------------|-----------|-----------|-----------|-----------|
| rs11599487 | rs1532472 | rs17803891 | rs27879   | rs4835748 | rs7082776 | rs9345060 |
| rs11600377 | rs1532825 | rs17804611 | rs2788223 | rs4835925 | rs7083712 | rs9346566 |
| rs1160065  | rs1532899 | rs17805232 | rs2788444 | rs4837221 | rs7083948 | rs934750  |
| rs11602163 | rs1532945 | rs17805404 | rs278933  | rs483741  | rs708424  | rs9348366 |
| rs11602933 | rs1533278 | rs17806015 | rs278937  | rs4837557 | rs7086136 | rs9348428 |
| rs11604748 | rs1533327 | rs17806063 | rs2789713 | rs4837864 | rs708851  | rs9348687 |
| rs11605427 | rs1533537 | rs17806203 | rs2789731 | rs4838404 | rs7089185 | rs9349028 |
| rs11605655 | rs1533756 | rs17807642 | rs2790608 | rs4838967 | rs7089993 | rs9350    |
| rs11606118 | rs1533802 | rs17808541 | rs279072  | rs4838985 | rs7090828 | rs9350088 |
| rs1160724  | rs1533866 | rs17809981 | rs2794410 | rs4840384 | rs7090878 | rs9354308 |
| rs11610561 | rs153445  | rs17810048 | rs2794841 | rs4841224 | rs7091016 | rs9355413 |
| rs11611695 | rs1534878 | rs17812414 | rs2795113 | rs4841365 | rs7091181 | rs9358907 |
| rs11615915 | rs1535655 | rs17813191 | rs2795114 | rs4841367 | rs7093411 | rs9359158 |
| rs11620631 | rs1538146 | rs17814943 | rs2796188 | rs4842080 | rs7094037 | rs9359486 |
| rs11621877 | rs1538240 | rs17814955 | rs2796278 | rs484213  | rs7094271 | rs9359935 |
| rs11622477 | rs1538459 | rs1781613  | rs2796822 | rs4842536 | rs7099339 | rs936267  |
| rs11623033 | rs1539289 | rs17816264 | rs2797128 | rs4842653 | rs7100255 | rs9364795 |
| rs11623084 | rs1539387 | rs17816651 | rs2798981 | rs4843586 | rs7101734 | rs936659  |
| rs11623566 | rs1539743 | rs17817076 | rs2799511 | rs484459  | rs7102614 | rs9366917 |
| rs11623714 | rs1540560 | rs17817114 | rs2799549 | rs4845284 | rs710422  | rs9367529 |
| rs11624306 | rs1541093 | rs17817153 | rs2801359 | rs484653  | rs7106357 | rs9369091 |
| rs11624349 | rs1541327 | rs17817901 | rs2801539 | rs4846644 | rs7106385 | rs9370102 |
| rs11624905 | rs154176  | rs17818883 | rs2804616 | rs4847431 | rs7106909 | rs9370741 |
| rs11625354 | rs1541856 | rs17819626 | rs2804702 | rs4848347 | rs710769  | rs9370767 |
| rs11625724 | rs1542563 | rs17819738 | rs2806974 | rs4848725 | rs7107955 | rs9371313 |
| rs11625750 | rs1542591 | rs17820230 | rs280709  | rs4849056 | rs711359  | rs9371449 |
| rs11626791 | rs1543362 | rs17820610 | rs2807328 | rs4849136 | rs7113940 | rs9371889 |
| rs11626855 | rs1543486 | rs17821756 | rs2809979 | rs4849285 | rs711565  | rs9372465 |
| rs11627074 | rs1543633 | rs17821818 | rs281001  | rs4849333 | rs7119666 | rs9373014 |
| rs11627370 | rs1544011 | rs17823705 | rs2811748 | rs4849362 | rs7120317 | rs9375652 |
| rs11629223 | rs154454  | rs17823717 | rs2812184 | rs4850694 | rs7120395 | rs9376268 |
| rs11629266 | rs1544625 | rs17824240 | rs2812295 | rs4851090 | rs7121394 | rs9377090 |
| rs11631192 | rs1544747 | rs17824297 | rs2812661 | rs4852084 | rs7122369 | rs9377136 |
| rs11631467 | rs1544823 | rs17824919 | rs2813866 | rs4852403 | rs7123375 | rs9377442 |
| rs11634405 | rs1544832 | rs17825723 | rs2815637 | rs4852824 | rs7128664 | rs937823  |
| rs11634762 | rs1545299 | rs17826482 | rs2815825 | rs4853969 | rs7131771 | rs9378389 |
| rs11634847 | rs1545314 | rs17826535 | rs2817691 | rs4854922 | rs713215  | rs937961  |
| rs11636328 | rs1545632 | rs17826646 | rs2817738 | rs4855536 | rs713504  | rs9380807 |
| rs11636452 | rs1546154 | rs17827160 | rs2818153 | rs4855915 | rs7136071 | rs9380903 |
| rs11638486 | rs1546746 | rs17827500 | rs2819560 | rs4855963 | rs7136840 | rs9383565 |
| rs11641062 | rs1547220 | rs17827708 | rs2820879 | rs4856244 | rs7137563 | rs9383634 |
| rs1164271  | rs1548043 | rs17829302 | rs2822767 | rs4856723 | rs7137731 | rs938432  |
| rs11643063 | rs1548421 | rs17829495 | rs2822842 | rs4857959 | rs7139313 | rs9384483 |
| rs1164636  | rs1548641 | rs17829613 | rs2822950 | rs4858264 | rs7139897 | rs9384573 |
| rs11646704 | rs1549228 | rs17830051 | rs2822967 | rs4859295 | rs714106  | rs9386728 |
| rs11647081 | rs1549463 | rs17830126 | rs2823056 | rs4861724 | rs7141349 | rs9388398 |
| rs11647428 | rs1549957 | rs17830672 | rs2823253 | rs4862150 | rs7141441 | rs9388772 |
| rs11647874 | rs1549981 | rs17832908 | rs2823288 | rs4862501 | rs7142752 | rs9390180 |
| rs11648891 | rs1550164 | rs17834386 | rs2824271 | rs4862617 | rs7143185 | rs9390419 |
| rs11649287 | rs1551212 | rs17834873 | rs2824367 | rs4862733 | rs7143796 | rs939046  |
| rs11650230 | rs1551278 | rs17835633 | rs2824669 | rs4862798 | rs714393  | rs9390641 |
| rs11654762 | rs1551529 | rs17835992 | rs2825074 | rs4862912 | rs7143973 | rs9392442 |
| rs11655365 | rs1551745 | rs17836410 | rs2826115 | rs486337  | rs7144254 | rs9393535 |
| rs11655536 | rs1552227 | rs17837232 | rs2826523 | rs4864388 | rs7144470 | rs9393597 |
| rs11655913 | rs155305  | rs17838628 | rs2826689 | rs4865885 | rs7144937 | rs9395125 |
| rs11656762 | rs1553582 | rs17839830 | rs2827124 | rs4865902 | rs7146194 | rs9396715 |
| rs11656870 | rs1554079 | rs17840511 | rs2827128 | rs4866654 | rs714694  | rs9397141 |
| rs11658318 | rs1554226 | rs17840514 | rs2828462 | rs4868294 | rs7147046 | rs9397605 |
| rs11659760 | rs1554377 | rs17840709 | rs2828492 | rs4868475 | rs714737  | rs9397945 |
| rs11659932 | rs1555141 | rs17841171 | rs2829170 | rs4868527 | rs7148942 | rs939916  |
| rs11660656 | rs1555541 | rs1786825  | rs2829200 | rs4869227 | rs7149020 | rs9400968 |
| rs11663205 | rs1555755 | rs178730   | rs2829684 | rs4869738 | rs7150111 | rs9401145 |
| rs11663206 | rs155583  | rs1787335  | rs2830434 | rs4870053 | rs7150987 | rs940129  |

|            |           |           |           |           |           |           |
|------------|-----------|-----------|-----------|-----------|-----------|-----------|
| rs11663874 | rs1555999 | rs179135  | rs2830602 | rs4870816 | rs7152024 | rs9402219 |
| rs11664423 | rs1556045 | rs1792134 | rs2831896 | rs4871613 | rs7152284 | rs9403105 |
| rs11664562 | rs1556170 | rs1792205 | rs2832141 | rs4871877 | rs7153710 | rs9403791 |
| rs11664882 | rs155648  | rs1792341 | rs2832652 | rs4872318 | rs7153813 | rs9404272 |
| rs11667945 | rs1556794 | rs1792360 | rs2832971 | rs487355  | rs7154330 | rs9405622 |
| rs1167241  | rs1556891 | rs1792505 | rs2833411 | rs4874132 | rs7155641 | rs9405676 |
| rs11673877 | rs1557102 | rs1792655 | rs2833413 | rs4874136 | rs715632  | rs9405867 |
| rs11675818 | rs1558389 | rs179524  | rs2833417 | rs4877045 | rs7158614 | rs9406138 |
| rs11675944 | rs1559833 | rs1795685 | rs2833421 | rs4877385 | rs715899  | rs9406472 |
| rs11677494 | rs1560082 | rs1796047 | rs2833423 | rs4877539 | rs7159296 | rs9406857 |
| rs1167795  | rs156029  | rs1796310 | rs2833432 | rs4878117 | rs7159326 | rs9410352 |
| rs1167802  | rs156093  | rs1800321 | rs2833435 | rs4879670 | rs7159719 | rs941048  |
| rs11678653 | rs156167  | rs1800597 | rs2833440 | rs4880842 | rs7159832 | rs9411179 |
| rs11678805 | rs156176  | rs1800624 | rs2833548 | rs4881058 | rs7160553 | rs941196  |
| rs11682553 | rs1561809 | rs1802837 | rs2833651 | rs4881333 | rs7161503 | rs9415486 |
| rs11683091 | rs1562337 | rs1805049 | rs283369  | rs4882381 | rs7161553 | rs9416061 |
| rs11683795 | rs1562743 | rs1806458 | rs2833917 | rs4882658 | rs7162035 | rs9421422 |
| rs11684111 | rs1564360 | rs180657  | rs2834043 | rs4882723 | rs7162121 | rs942149  |
| rs11685676 | rs1564691 | rs1806656 | rs2834047 | rs4883187 | rs7163473 | rs9421682 |
| rs11685775 | rs1565468 | rs1807833 | rs2834251 | rs4883796 | rs7164988 | rs942317  |
| rs11686290 | rs1565481 | rs1808881 | rs2834252 | rs4883816 | rs7166894 | rs9423376 |
| rs11690249 | rs1565862 | rs181454  | rs2834269 | rs4884119 | rs7168512 | rs942395  |
| rs11693090 | rs1566078 | rs1816652 | rs2834388 | rs4885276 | rs7168889 | rs9424574 |
| rs11693372 | rs1566103 | rs181939  | rs2834502 | rs4886119 | rs716934  | rs942540  |
| rs11693848 | rs1566275 | rs182009  | rs2834503 | rs4886520 | rs716949  | rs9425973 |
| rs11693885 | rs1566668 | rs1822430 | rs2834590 | rs4889215 | rs7170765 | rs942702  |
| rs11695103 | rs1567759 | rs1826710 | rs2834611 | rs4889299 | rs7171218 | rs942790  |
| rs11695409 | rs1568356 | rs183112  | rs2834620 | rs4889658 | rs7171383 | rs9429095 |
| rs11695965 | rs1568805 | rs1832756 | rs2834708 | rs4889856 | rs7171468 | rs942938  |
| rs11695967 | rs15702   | rs1834197 | rs2834939 | rs4890614 | rs7171655 | rs9429825 |
| rs11696342 | rs1570350 | rs1834536 | rs2834940 | rs4891173 | rs7171722 | rs9433138 |
| rs11697104 | rs1571870 | rs1835834 | rs2835330 | rs4891529 | rs7171728 | rs943387  |
| rs11697606 | rs1573320 | rs1836870 | rs2835332 | rs4893552 | rs717589  | rs943392  |
| rs11697914 | rs1574360 | rs1837502 | rs2835358 | rs4894425 | rs7178130 | rs943601  |
| rs11698354 | rs1574509 | rs1840070 | rs2836168 | rs4894526 | rs7178409 | rs9437663 |
| rs11699263 | rs1576674 | rs1843618 | rs2836487 | rs4896376 | rs7178655 | rs9443404 |
| rs11699339 | rs1576689 | rs184390  | rs28366   | rs4896505 | rs7179024 | rs944725  |
| rs1170     | rs1577596 | rs1844850 | rs2836805 | rs4896607 | rs7180959 | rs9451481 |
| rs11709646 | rs1580298 | rs1845789 | rs2836840 | rs4896804 | rs7181188 | rs945335  |
| rs11709668 | rs1580512 | rs1850549 | rs2836990 | rs4896896 | rs7181724 | rs945584  |
| rs1170994  | rs1582091 | rs1855253 | rs2836992 | rs4897560 | rs718219  | rs945699  |
| rs11710433 | rs1585297 | rs1855639 | rs2837006 | rs4898725 | rs7182242 | rs9458254 |
| rs11711461 | rs1585972 | rs1858071 | rs2837034 | rs4899260 | rs7182253 | rs9458878 |
| rs11711597 | rs1586383 | rs1858391 | rs2837095 | rs4899329 | rs7183152 | rs9458957 |
| rs11711698 | rs1587235 | rs1860391 | rs2837097 | rs4899365 | rs7183458 | rs9460406 |
| rs1171274  | rs158777  | rs1861429 | rs2837467 | rs4899659 | rs7184674 | rs946262  |
| rs1171442  | rs1588645 | rs1861442 | rs2838096 | rs4900237 | rs7184988 | rs946470  |
| rs11714611 | rs1589525 | rs1861586 | rs2838551 | rs4900251 | rs7185064 | rs9464700 |
| rs11714683 | rs1589836 | rs1861792 | rs2838897 | rs490507  | rs7185203 | rs9468473 |
| rs1171565  | rs159018  | rs1862886 | rs2839575 | rs4905430 | rs7185362 | rs9470990 |
| rs11715936 | rs15921   | rs1863289 | rs2839579 | rs4905564 | rs7186021 | rs9472250 |
| rs11716753 | rs159352  | rs1863313 | rs2839651 | rs490570  | rs718609  | rs9472790 |
| rs11717973 | rs1596721 | rs1863464 | rs2840107 | rs4906007 | rs7188540 | rs9473066 |
| rs11718322 | rs1598161 | rs1863904 | rs2840616 | rs4906086 | rs7189795 | rs9476767 |
| rs11721545 | rs1598444 | rs1865149 | rs2842180 | rs4906742 | rs7190455 | rs9479055 |
| rs11725416 | rs159938  | rs1865307 | rs2842325 | rs4906753 | rs7190649 | rs9481267 |
| rs11726514 | rs1599767 | rs1865656 | rs2842485 | rs4907097 | rs7190664 | rs948221  |
| rs11727065 | rs1599770 | rs1865806 | rs284328  | rs4907140 | rs7190785 | rs948333  |
| rs11729673 | rs1599795 | rs1866298 | rs2844697 | rs4907154 | rs7191379 | rs9490300 |
| rs1173104  | rs1605763 | rs1866321 | rs2844766 | rs4908594 | rs7191870 | rs949033  |
| rs11732439 | rs1605940 | rs1866948 | rs284691  | rs4909017 | rs719272  | rs9491562 |
| rs11732823 | rs1606990 | rs1867042 | rs2848520 | rs4909854 | rs7192878 | rs949295  |
| rs11734518 | rs1609085 | rs1868272 | rs2849236 | rs4910228 | rs7192973 | rs9493923 |

|            |            |           |           |           |           |           |
|------------|------------|-----------|-----------|-----------|-----------|-----------|
| rs11734793 | rs1610261  | rs1868573 | rs285284  | rs4910577 | rs7194256 | rs9496542 |
| rs11735580 | rs1614012  | rs1869640 | rs2853129 | rs4910817 | rs7194904 | rs949824  |
| rs11736271 | rs1614765  | rs1869965 | rs2853362 | rs4911461 | rs7195333 | rs9502516 |
| rs11738126 | rs1614787  | rs1870087 | rs2853676 | rs4911540 | rs7196558 | rs9506933 |
| rs11740843 | rs1615127  | rs1870563 | rs2856042 | rs491182  | rs719736  | rs950805  |
| rs11741296 | rs161551   | rs1871313 | rs2858838 | rs4912192 | rs719869  | rs9508272 |
| rs11743343 | rs1617315  | rs187136  | rs2858889 | rs4912632 | rs7199765 | rs9509076 |
| rs11743461 | rs1618972  | rs1872469 | rs2859481 | rs4912870 | rs7199789 | rs950922  |
| rs11743712 | rs1620326  | rs1872556 | rs2862466 | rs4912905 | rs720010  | rs9509917 |
| rs11743992 | rs1622127  | rs1873085 | rs2862745 | rs491534  | rs7200548 | rs9510483 |
| rs11746013 | rs1623169  | rs1873405 | rs2862827 | rs4915896 | rs7201586 | rs9510515 |
| rs11746377 | rs1625605  | rs1873549 | rs2862907 | rs4916044 | rs7202069 | rs9510745 |
| rs11746464 | rs1629422  | rs1873714 | rs2863990 | rs4916358 | rs7202925 | rs9511440 |
| rs11747317 | rs1629816  | rs1874094 | rs286470  | rs4917238 | rs7204541 | rs9511916 |
| rs11749493 | rs1630504  | rs1874173 | rs2864915 | rs4917446 | rs7204750 | rs9512083 |
| rs11751016 | rs163284   | rs1875233 | rs2865264 | rs4917734 | rs7205816 | rs9512503 |
| rs1175115  | rs163291   | rs1875539 | rs2867665 | rs4918128 | rs7205951 | rs9515653 |
| rs11751799 | rs1634717  | rs1876214 | rs2867743 | rs4918445 | rs7206344 | rs9516019 |
| rs11752338 | rs1638675  | rs1876458 | rs2868147 | rs4919105 | rs7206493 | rs951739  |
| rs11753883 | rs1639438  | rs1876550 | rs2868195 | rs4919768 | rs7207280 | rs9518578 |
| rs11755280 | rs164077   | rs1876555 | rs286941  | rs4921056 | rs7207432 | rs9518812 |
| rs11756702 | rs1641025  | rs1876557 | rs286953  | rs4921257 | rs7207689 | rs9519032 |
| rs11758158 | rs1642002  | rs1876560 | rs2874716 | rs4921639 | rs720858  | rs951970  |
| rs1176048  | rs1642607  | rs1876875 | rs2876124 | rs4922859 | rs720863  | rs9525158 |
| rs11762997 | rs164342   | rs1877206 | rs2876365 | rs4923452 | rs7209174 | rs952581  |
| rs11763059 | rs1646112  | rs1877564 | rs2876794 | rs492346  | rs7210251 | rs9525969 |
| rs11763155 | rs1646119  | rs1877900 | rs2877689 | rs4924052 | rs7212114 | rs952663  |
| rs1176488  | rs1648404  | rs1878490 | rs2877986 | rs4924200 | rs7213894 | rs9526719 |
| rs11766212 | rs1648590  | rs1878585 | rs2880131 | rs492438  | rs7214255 | rs9528086 |
| rs11768435 | rs1648618  | rs1879490 | rs2881691 | rs4925722 | rs7214646 | rs9528407 |
| rs11769363 | rs1648692  | rs1879935 | rs2882231 | rs4925735 | rs7214924 | rs9529257 |
| rs11770341 | rs164870   | rs1880080 | rs2883369 | rs4925811 | rs7215009 | rs9529814 |
| rs11774066 | rs1652366  | rs1881187 | rs2883380 | rs4926679 | rs721523  | rs9529835 |
| rs11775188 | rs1655645  | rs1881240 | rs2883456 | rs4926985 | rs7215330 | rs9530019 |
| rs11775659 | rs1658999  | rs1882786 | rs2885128 | rs4926987 | rs7215990 | rs9530343 |
| rs11776727 | rs166031   | rs1883146 | rs2886117 | rs4928043 | rs7217156 | rs953065  |
| rs11777279 | rs1662749  | rs1883916 | rs2887474 | rs492960  | rs7217396 | rs9531539 |
| rs1177762  | rs166541   | rs1884450 | rs288756  | rs4930034 | rs721936  | rs953239  |
| rs11778661 | rs1671463  | rs1884834 | rs288761  | rs4930081 | rs7219963 | rs9532462 |
| rs11779919 | rs167189   | rs1885725 | rs2890987 | rs4932279 | rs7220388 | rs9534017 |
| rs11780659 | rs1672902  | rs1886195 | rs2890989 | rs4932356 | rs7220662 | rs953527  |
| rs11783436 | rs1673086  | rs1886254 | rs2891193 | rs4933583 | rs7221160 | rs9535763 |
| rs11784496 | rs167771   | rs1886642 | rs2892403 | rs4936822 | rs7221263 | rs953593  |
| rs11786526 | rs1678640  | rs1886811 | rs2893440 | rs4937159 | rs7221952 | rs953672  |
| rs11786647 | rs1680865  | rs1887427 | rs2893986 | rs4937412 | rs7222386 | rs9537969 |
| rs11786660 | rs1681305  | rs1887596 | rs2894132 | rs4937817 | rs7222891 | rs9539303 |
| rs11786924 | rs16822892 | rs1887773 | rs2894250 | rs4938659 | rs7222976 | rs953932  |
| rs11787069 | rs16825320 | rs1887874 | rs2894451 | rs4939735 | rs7222980 | rs9539377 |
| rs11789122 | rs1682542  | rs1888322 | rs289469  | rs4940044 | rs7223010 | rs9540493 |
| rs11789687 | rs16825896 | rs1889229 | rs289553  | rs4940099 | rs7224361 | rs9540823 |
| rs11791479 | rs16826069 | rs189004  | rs289581  | rs4940205 | rs7224664 | rs954295  |
| rs1179480  | rs16826262 | rs1890138 | rs2896536 | rs4940399 | rs7225015 | rs9543383 |
| rs11794839 | rs16826409 | rs1890398 | rs2896970 | rs4940405 | rs722504  | rs954360  |
| rs11794985 | rs16826833 | rs1891187 | rs2897581 | rs4941026 | rs7225855 | rs9543667 |
| rs11795311 | rs1682913  | rs1891234 | rs2898881 | rs4941066 | rs7226024 | rs9543678 |
| rs1179811  | rs16830166 | rs1892275 | rs2899656 | rs4941135 | rs722723  | rs9544177 |
| rs11800273 | rs16832125 | rs1893373 | rs2899872 | rs4941306 | rs7227251 | rs954428  |
| rs11804085 | rs16832918 | rs189339  | rs2900274 | rs4942601 | rs722749  | rs9544614 |
| rs11811985 | rs16833177 | rs1893543 | rs2900422 | rs4943387 | rs7227945 | rs954651  |
| rs11816865 | rs16833707 | rs1893729 | rs2901990 | rs4943826 | rs7228288 | rs9547602 |
| rs11817325 | rs16834735 | rs1894239 | rs2902287 | rs4943885 | rs7229378 | rs9548235 |
| rs11818053 | rs16836018 | rs1894428 | rs290265  | rs4945155 | rs723042  | rs9550863 |
| rs11829968 | rs16836256 | rs189523  | rs2903478 | rs4945603 | rs7230644 | rs9551815 |

|            |            |           |           |           |           |           |
|------------|------------|-----------|-----------|-----------|-----------|-----------|
| rs11833941 | rs16837021 | rs1895600 | rs2903500 | rs494607  | rs7231092 | rs955350  |
| rs11834800 | rs16837611 | rs1895628 | rs2903589 | rs4946102 | rs7231300 | rs9554928 |
| rs11838655 | rs16837688 | rs1895671 | rs2906607 | rs4946435 | rs7231732 | rs9554990 |
| rs11846575 | rs16838147 | rs1896216 | rs290761  | rs4949718 | rs7233241 | rs9556524 |
| rs11846774 | rs16838214 | rs1896807 | rs2908498 | rs4949952 | rs7233676 | rs9557776 |
| rs11847212 | rs16838536 | rs1896837 | rs2909275 | rs4951084 | rs7234270 | rs9558691 |
| rs11847602 | rs16838982 | rs1896967 | rs2909433 | rs4951114 | rs7234280 | rs9561485 |
| rs11848645 | rs16841262 | rs1896981 | rs2910596 | rs4951488 | rs7234762 | rs956186  |
| rs11849916 | rs16842292 | rs1897781 | rs2911266 | rs4952548 | rs7234920 | rs9563120 |
| rs11850195 | rs16843879 | rs1897924 | rs2911849 | rs4952605 | rs7234929 | rs9564391 |
| rs11850325 | rs16844035 | rs1898107 | rs2912383 | rs4954477 | rs7235775 | rs9564681 |
| rs11854628 | rs16844281 | rs1899080 | rs2913315 | rs4954697 | rs723698  | rs9564885 |
| rs11854764 | rs16844825 | rs1900157 | rs2913466 | rs4954835 | rs7237979 | rs9564996 |
| rs11855635 | rs16844874 | rs190119  | rs2913541 | rs4954956 | rs7239326 | rs9566168 |
| rs11859065 | rs1684604  | rs1901378 | rs291402  | rs4955277 | rs7240169 | rs9566446 |
| rs1186007  | rs16846960 | rs1902750 | rs2914481 | rs4955455 | rs7240392 | rs9567557 |
| rs11860456 | rs16847357 | rs1903282 | rs2914752 | rs4956755 | rs7240953 | rs9568800 |
| rs11860733 | rs16847945 | rs1903620 | rs2915028 | rs4958890 | rs7240955 | rs9569016 |
| rs1186173  | rs16848132 | rs1903999 | rs2915923 | rs4959786 | rs7242554 | rs956993  |
| rs11863005 | rs16849184 | rs1905141 | rs291765  | rs4959951 | rs7243148 | rs9570083 |
| rs1186309  | rs16849688 | rs1906881 | rs2917816 | rs4961513 | rs7244533 | rs957103  |
| rs11864214 | rs16850481 | rs1907094 | rs2918117 | rs4961575 | rs7244635 | rs9571713 |
| rs11866964 | rs16851049 | rs1907238 | rs2919824 | rs496170  | rs724677  | rs957256  |
| rs11870376 | rs16852249 | rs1907998 | rs29214   | rs4962261 | rs724929  | rs9573665 |
| rs11870402 | rs16852350 | rs1909879 | rs292301  | rs4963933 | rs7249968 | rs9573810 |
| rs1187087  | rs16852803 | rs1911904 | rs2923084 | rs4964839 | rs7250748 | rs9575557 |
| rs11872265 | rs16852952 | rs1911999 | rs292379  | rs4965177 | rs7251901 | rs9578362 |
| rs11874339 | rs16853747 | rs1912278 | rs2924936 | rs4965617 | rs7257225 | rs9579206 |
| rs11875811 | rs16854559 | rs1914188 | rs2926827 | rs4968162 | rs7257937 | rs9580040 |
| rs11875892 | rs16855026 | rs1915228 | rs293553  | rs4972581 | rs7259430 | rs958047  |
| rs11876996 | rs1685593  | rs191615  | rs293561  | rs4972740 | rs725981  | rs958110  |
| rs11877045 | rs16856700 | rs1918358 | rs2936840 | rs4972741 | rs726121  | rs9581774 |
| rs11878067 | rs16856889 | rs1919800 | rs293904  | rs4973768 | rs7261312 | rs9581885 |
| rs1188267  | rs16856890 | rs192015  | rs293963  | rs4974486 | rs7266642 | rs9582359 |
| rs1188287  | rs16857179 | rs1920556 | rs2939678 | rs4975249 | rs726692  | rs9582457 |
| rs1188300  | rs16857363 | rs1920963 | rs2941288 | rs4976946 | rs726896  | rs958671  |
| rs1188303  | rs16858119 | rs1920990 | rs2941541 | rs4977610 | rs726945  | rs958937  |
| rs11886417 | rs16858371 | rs1921635 | rs2942812 | rs4978368 | rs7273138 | rs9590664 |
| rs11890413 | rs16858662 | rs1922005 | rs2946535 | rs4980804 | rs7276737 | rs9592629 |
| rs11890918 | rs16858694 | rs1922526 | rs2949538 | rs4980964 | rs7281694 | rs959380  |
| rs11891214 | rs16860316 | rs1922549 | rs294958  | rs4981021 | rs728396  | rs9595567 |
| rs11891860 | rs16860332 | rs1922761 | rs2950044 | rs4981181 | rs728437  | rs9597353 |
| rs11891871 | rs16861305 | rs1922840 | rs2951874 | rs4981447 | rs728448  | rs9597687 |
| rs1189273  | rs16861582 | rs1925211 | rs2952    | rs4982057 | rs728469  | rs9599591 |
| rs1189309  | rs16861588 | rs1925299 | rs2954030 | rs4982062 | rs7284996 | rs9603957 |
| rs11893803 | rs16861606 | rs1925530 | rs2954032 | rs4982420 | rs7285836 | rs960772  |
| rs11898422 | rs16862322 | rs1925637 | rs2956337 | rs4982579 | rs7286805 | rs9607885 |
| rs11901093 | rs16862648 | rs1926256 | rs2956969 | rs4982628 | rs728758  | rs9608555 |
| rs11901967 | rs16863396 | rs1926370 | rs2958196 | rs4983221 | rs7288749 | rs9611766 |
| rs11903403 | rs16863656 | rs1927196 | rs2958482 | rs4983243 | rs729077  | rs961233  |
| rs11905489 | rs16863922 | rs1927362 | rs2958831 | rs498360  | rs729242  | rs9612385 |
| rs11911730 | rs16864871 | rs1927520 | rs2958835 | rs4985000 | rs729478  | rs9614277 |
| rs11916352 | rs16866183 | rs1927641 | rs2959369 | rs4987391 | rs7296765 | rs9615401 |
| rs11916892 | rs16866328 | rs1927902 | rs2959465 | rs4988714 | rs729752  | rs9615754 |
| rs11921923 | rs16866413 | rs1927976 | rs2959788 | rs499685  | rs7300198 | rs9615999 |
| rs11922593 | rs16866776 | rs1928023 | rs2960807 | rs4997204 | rs7302292 | rs961848  |
| rs1192668  | rs16867841 | rs1928367 | rs2962586 | rs4998985 | rs7303006 | rs9619878 |
| rs1193177  | rs16868020 | rs1928428 | rs2962975 | rs500079  | rs7303124 | rs962667  |
| rs11934600 | rs16868385 | rs1928663 | rs2963282 | rs500486  | rs730412  | rs9630721 |
| rs11935955 | rs16869089 | rs1930168 | rs2963750 | rs500869  | rs7304475 | rs963513  |
| rs11936402 | rs16869706 | rs1930665 | rs2963899 | rs5012560 | rs7307330 | rs9635520 |
| rs11937850 | rs16869850 | rs1933001 | rs2964534 | rs501582  | rs7307613 | rs9636013 |
| rs11938760 | rs16869959 | rs1933244 | rs296497  | rs5018214 | rs7307700 | rs963828  |

|            |            |           |           |           |           |           |
|------------|------------|-----------|-----------|-----------|-----------|-----------|
| rs11938908 | rs16869961 | rs1933398 | rs2965710 | rs5018317 | rs7308644 | rs9638774 |
| rs11945237 | rs16871093 | rs1933748 | rs2967305 | rs501878  | rs730955  | rs964039  |
| rs1194586  | rs16871638 | rs1933961 | rs2967932 | rs5019250 | rs731066  | rs964307  |
| rs11947369 | rs16872141 | rs193722  | rs2968126 | rs501963  | rs7310727 | rs964528  |
| rs11948898 | rs16873628 | rs193805  | rs2969230 | rs5022234 | rs7311147 | rs964680  |
| rs11949031 | rs16873698 | rs193818  | rs2970346 | rs5024722 | rs7311934 | rs9647358 |
| rs11949063 | rs16873989 | rs1938287 | rs2970364 | rs5029748 | rs7313833 | rs9648874 |
| rs11951359 | rs16875707 | rs1938355 | rs2970391 | rs5030102 | rs7315267 | rs96501   |
| rs11952802 | rs16876554 | rs1939661 | rs2971809 | rs5030419 | rs7316419 | rs965500  |
| rs11955034 | rs16877646 | rs1939842 | rs2972112 | rs506149  | rs7316596 | rs9656301 |
| rs11955142 | rs16877929 | rs1940153 | rs2973179 | rs506154  | rs7316983 | rs965815  |
| rs1195751  | rs16879090 | rs1940169 | rs297508  | rs506274  | rs7317338 | rs966766  |
| rs11958875 | rs16880108 | rs1940954 | rs297509  | rs506396  | rs7318019 | rs967182  |
| rs11964366 | rs16880329 | rs194282  | rs2975732 | rs506585  | rs7318487 | rs9677360 |
| rs1196512  | rs16881760 | rs194320  | rs2975762 | rs506685  | rs7318977 | rs967751  |
| rs11969912 | rs16882767 | rs1943337 | rs2975776 | rs507480  | rs731945  | rs967824  |
| rs11971297 | rs16883981 | rs1943633 | rs297581  | rs507795  | rs7319775 | rs968119  |
| rs11972220 | rs16884643 | rs1944788 | rs2975997 | rs509749  | rs732095  | rs9682941 |
| rs11974348 | rs16884711 | rs194490  | rs297658  | rs511843  | rs7321280 | rs9683673 |
| rs11978751 | rs16885269 | rs1944962 | rs2977491 | rs512398  | rs7322063 | rs9685238 |
| rs11978924 | rs16886518 | rs1945034 | rs297755  | rs512770  | rs7322400 | rs9685444 |
| rs11979177 | rs16889129 | rs1945159 | rs2978950 | rs513873  | rs7323498 | rs968578  |
| rs11980902 | rs16889224 | rs1945906 | rs2980214 | rs515826  | rs732375  | rs9685797 |
| rs11981089 | rs16889302 | rs1945941 | rs2981582 | rs515975  | rs7325773 | rs968899  |
| rs11984293 | rs16889308 | rs1946295 | rs2982530 | rs516971  | rs7327037 | rs968969  |
| rs11984568 | rs16889488 | rs1946768 | rs2985181 | rs517222  | rs732807  | rs969016  |
| rs11987923 | rs16889923 | rs1947345 | rs2985439 | rs517542  | rs7329099 | rs9691771 |
| rs11990473 | rs16890249 | rs1947346 | rs2985714 | rs519113  | rs7329561 | rs9693412 |
| rs11991912 | rs16890585 | rs1948610 | rs2986257 | rs519951  | rs733164  | rs9694603 |
| rs11997438 | rs16891251 | rs1950134 | rs2986258 | rs521750  | rs733278  | rs9695540 |
| rs11999319 | rs16892489 | rs1950736 | rs2986261 | rs522737  | rs7332883 | rs9696070 |
| rs11999893 | rs16893068 | rs1950935 | rs2986676 | rs524273  | rs7333503 | rs969947  |
| rs12002981 | rs16893399 | rs1951054 | rs2986684 | rs524815  | rs733394  | rs970056  |
| rs12003792 | rs16893604 | rs1951182 | rs298748  | rs526546  | rs7334904 | rs970668  |
| rs12006576 | rs16893639 | rs1951626 | rs2991304 | rs526645  | rs733576  | rs971646  |
| rs1200819  | rs16893969 | rs1951743 | rs2993013 | rs527278  | rs7338389 | rs972459  |
| rs1200863  | rs16894806 | rs1951803 | rs2993443 | rs527530  | rs734442  | rs973071  |
| rs12010294 | rs168961   | rs1952427 | rs2993568 | rs527709  | rs7349528 | rs973369  |
| rs12015181 | rs16896442 | rs1955504 | rs2994525 | rs528454  | rs735244  | rs974190  |
| rs1201673  | rs16899706 | rs1955530 | rs299455  | rs528499  | rs7355173 | rs9742004 |
| rs12025057 | rs16899808 | rs1956028 | rs2995992 | rs530050  | rs735543  | rs974799  |
| rs12025537 | rs16900242 | rs1956532 | rs2996245 | rs531141  | rs7356554 | rs9752942 |
| rs1202640  | rs16901653 | rs1957414 | rs299700  | rs531269  | rs7358265 | rs975317  |
| rs1202815  | rs16902409 | rs1957961 | rs2997131 | rs531773  | rs7358855 | rs9757129 |
| rs12028510 | rs16903499 | rs1959020 | rs2997545 | rs532440  | rs736576  | rs9766117 |
| rs12028614 | rs16904843 | rs1959250 | rs2997565 | rs533232  | rs7366469 | rs976799  |
| rs12028945 | rs16907160 | rs1959641 | rs2999896 | rs533480  | rs7367549 | rs978057  |
| rs12029094 | rs16908718 | rs1961218 | rs300267  | rs534590  | rs736871  | rs9783145 |
| rs12029185 | rs16908737 | rs1961245 | rs3003136 | rs534863  | rs7371163 | rs9783925 |
| rs12029812 | rs16910692 | rs1961326 | rs3003137 | rs535614  | rs7372889 | rs9788504 |
| rs12032080 | rs16913371 | rs196499  | rs3003308 | rs540486  | rs7373248 | rs978936  |
| rs12036045 | rs16913642 | rs1965092 | rs3003542 | rs540784  | rs7375553 | rs9789473 |
| rs12036495 | rs16913851 | rs1966938 | rs300406  | rs540909  | rs7377903 | rs9789561 |
| rs12037713 | rs16914651 | rs1967422 | rs3006220 | rs541306  | rs7380789 | rs9791179 |
| rs12043707 | rs16917194 | rs1969137 | rs300640  | rs542816  | rs738705  | rs979863  |
| rs12044179 | rs16917441 | rs1969512 | rs3007242 | rs542866  | rs7387456 | rs9805429 |
| rs1204494  | rs16917712 | rs1970168 | rs3007737 | rs543629  | rs738872  | rs9806177 |
| rs12045016 | rs16917898 | rs1972373 | rs300838  | rs544223  | rs738967  | rs9807047 |
| rs12049    | rs16918302 | rs1972582 | rs300951  | rs544595  | rs740182  | rs9807596 |
| rs1205017  | rs16918866 | rs1973716 | rs30099   | rs545114  | rs740216  | rs9809051 |
| rs12053900 | rs16918937 | rs197416  | rs3010083 | rs545925  | rs7407574 | rs9811251 |
| rs12054067 | rs16919947 | rs1975624 | rs3010291 | rs5468    | rs740764  | rs9813959 |
| rs12055620 | rs1692109  | rs1975631 | rs3010419 | rs547742  | rs740834  | rs981445  |

|            |            |           |           |           |           |           |
|------------|------------|-----------|-----------|-----------|-----------|-----------|
| rs1205700  | rs16921106 | rs1975937 | rs3010456 | rs547984  | rs7408803 | rs9814581 |
| rs1205880  | rs16921544 | rs197602  | rs3013028 | rs548890  | rs741677  | rs9815403 |
| rs12067732 | rs16922434 | rs197605  | rs3014928 | rs550254  | rs741872  | rs981782  |
| rs12068326 | rs16922637 | rs197638  | rs3014935 | rs550315  | rs742086  | rs9818299 |
| rs12073537 | rs16926244 | rs1977739 | rs3014937 | rs550697  | rs7422216 | rs9818792 |
| rs12080114 | rs16927048 | rs197816  | rs3016380 | rs551269  | rs742554  | rs9819272 |
| rs12080175 | rs16927698 | rs1978628 | rs30187   | rs552655  | rs7427341 | rs981949  |
| rs1208255  | rs16929838 | rs1980153 | rs302050  | rs553696  | rs7429249 | rs9824120 |
| rs12095938 | rs16929857 | rs1980211 | rs3026398 | rs553789  | rs7429701 | rs9824824 |
| rs1209879  | rs16929894 | rs1980275 | rs302645  | rs554500  | rs7432763 | rs9824937 |
| rs12105231 | rs16929997 | rs1980523 | rs303585  | rs555213  | rs7438723 | rs9825708 |
| rs12107110 | rs16930445 | rs1981719 | rs304257  | rs555255  | rs744230  | rs982598  |
| rs12111818 | rs16931414 | rs1981827 | rs304719  | rs555457  | rs7442604 | rs9827505 |
| rs12117730 | rs16931579 | rs1981847 | rs307621  | rs55568   | rs744366  | rs9827708 |
| rs12117865 | rs16931634 | rs1982761 | rs308727  | rs558190  | rs7445123 | rs9830737 |
| rs12118892 | rs1693204  | rs1982773 | rs3091237 | rs558448  | rs7445264 | rs9831738 |
| rs12122532 | rs1693219  | rs1983042 | rs3091338 | rs559746  | rs7446326 | rs9833097 |
| rs12123306 | rs1693262  | rs1983699 | rs3092949 | rs560096  | rs7452932 | rs9833147 |
| rs12124206 | rs16933075 | rs1984069 | rs309370  | rs561393  | rs745467  | rs983402  |
| rs12124784 | rs16934768 | rs1984334 | rs3094112 | rs561747  | rs7456175 | rs983544  |
| rs12130746 | rs16935195 | rs1988652 | rs309419  | rs562063  | rs7458419 | rs9837287 |
| rs12133624 | rs16935363 | rs1989891 | rs3095162 | rs562720  | rs7458446 | rs9838974 |
| rs12133803 | rs16936254 | rs1990011 | rs3096566 | rs563811  | rs7460774 | rs9841174 |
| rs12134023 | rs16936333 | rs1990339 | rs3096622 | rs563835  | rs7461303 | rs9841271 |
| rs12134274 | rs16937119 | rs199070  | rs3097838 | rs564534  | rs7461577 | rs9844501 |
| rs12135982 | rs16937774 | rs1991912 | rs3099087 | rs565947  | rs7465143 | rs984468  |
| rs12136489 | rs16937879 | rs1992695 | rs3099771 | rs567577  | rs746612  | rs984543  |
| rs12138119 | rs16938094 | rs1993068 | rs310339  | rs567675  | rs7469438 | rs9845811 |
| rs12139505 | rs16938625 | rs1993295 | rs3104793 | rs567774  | rs7474686 | rs984593  |
| rs12140120 | rs16938902 | rs1993831 | rs3105668 | rs568083  | rs7474890 | rs9849265 |
| rs12141297 | rs16939284 | rs1994511 | rs310749  | rs568298  | rs7478872 | rs9849601 |
| rs12145177 | rs16939318 | rs1994523 | rs3109633 | rs569523  | rs748065  | rs9850192 |
| rs12146143 | rs16939766 | rs1994890 | rs3110095 | rs570718  | rs748111  | rs985053  |
| rs12146624 | rs16940544 | rs1994893 | rs3111182 | rs570763  | rs748476  | rs985189  |
| rs12147530 | rs16940559 | rs1994930 | rs3112624 | rs571870  | rs7485782 | rs9852257 |
| rs12148103 | rs16940607 | rs1995157 | rs3113176 | rs573269  | rs7486563 | rs985270  |
| rs12148733 | rs16940811 | rs1995240 | rs3113303 | rs574322  | rs7488279 | rs9855033 |
| rs12150796 | rs16940820 | rs1995561 | rs3115192 | rs5743467 | rs748897  | rs9855973 |
| rs12151129 | rs16941655 | rs1996970 | rs3117077 | rs5744174 | rs7495116 | rs985604  |
| rs12151426 | rs16942387 | rs1997213 | rs311734  | rs574610  | rs7495132 | rs985810  |
| rs12152314 | rs16942794 | rs1997923 | rs3118077 | rs574704  | rs749516  | rs9859842 |
| rs1216114  | rs16943148 | rs1997941 | rs3118848 | rs5748736 | rs7496849 | rs9864040 |
| rs12161419 | rs16944623 | rs1998240 | rs311974  | rs5749441 | rs7497113 | rs9866721 |
| rs12162135 | rs16944699 | rs1998537 | rs3120123 | rs5749621 | rs7497644 | rs9870231 |
| rs12165392 | rs16945023 | rs1998603 | rs3120272 | rs575107  | rs7499886 | rs9871134 |
| rs12170152 | rs16946881 | rs1998697 | rs3121688 | rs5751188 | rs750142  | rs987121  |
| rs1217103  | rs16949281 | rs1999240 | rs3123375 | rs5752773 | rs750375  | rs9872295 |
| rs12178343 | rs16949865 | rs1999989 | rs3123696 | rs5753905 | rs750597  | rs9872962 |
| rs12186616 | rs16949872 | rs2001132 | rs3124942 | rs5753960 | rs7506674 | rs9881155 |
| rs12187334 | rs16950158 | rs200153  | rs31251   | rs5754560 | rs7506882 | rs988157  |
| rs121883   | rs16950471 | rs2001630 | rs3125530 | rs5754891 | rs750829  | rs9883101 |
| rs12191680 | rs16950574 | rs200211  | rs3127553 | rs5758651 | rs7508604 | rs9883556 |
| rs1219178  | rs16952327 | rs2002308 | rs3128927 | rs5761700 | rs750885  | rs9884371 |
| rs12194812 | rs16953034 | rs2002628 | rs3130003 | rs5761805 | rs750890  | rs9886221 |
| rs12195371 | rs16954056 | rs2004679 | rs313138  | rs576209  | rs7509143 | rs9886484 |
| rs12197402 | rs16954086 | rs2005061 | rs3131514 | rs5762870 | rs751041  | rs9888309 |
| rs12198445 | rs16954244 | rs2006958 | rs3132069 | rs5764559 | rs751104  | rs9889782 |
| rs12199342 | rs16954722 | rs2007470 | rs3134086 | rs5765168 | rs7512415 | rs989228  |
| rs12202023 | rs16954755 | rs2007787 | rs3135330 | rs5765532 | rs751307  | rs9893651 |
| rs1220228  | rs16955459 | rs2008476 | rs313757  | rs5765930 | rs7513369 | rs9894228 |
| rs12203073 | rs16955919 | rs2009858 | rs3138144 | rs5766924 | rs7513749 | rs989715  |
| rs12203275 | rs16957548 | rs2009923 | rs314274  | rs5768330 | rs751375  | rs9897263 |
| rs12203482 | rs16958770 | rs2010452 | rs314640  | rs5768335 | rs7515312 | rs9897991 |

|            |            |           |           |           |           |           |
|------------|------------|-----------|-----------|-----------|-----------|-----------|
| rs12204525 | rs16959303 | rs2010691 | rs314671  | rs5768349 | rs7517189 | rs9898190 |
| rs12206960 | rs16959412 | rs2010834 | rs316720  | rs5770406 | rs7519626 | rs9901984 |
| rs12208807 | rs16959580 | rs2012187 | rs317026  | rs577500  | rs7519797 | rs9904765 |
| rs12209650 | rs16960166 | rs2013731 | rs3176790 | rs578015  | rs7521309 | rs9904772 |
| rs12210653 | rs16960860 | rs2014397 | rs317940  | rs578150  | rs7522025 | rs9904986 |
| rs12210827 | rs16961072 | rs2015018 | rs317942  | rs580887  | rs7522247 | rs9905306 |
| rs12211381 | rs16961199 | rs2015066 | rs3181309 | rs581331  | rs7522521 | rs9906186 |
| rs12212827 | rs16962703 | rs2015169 | rs319319  | rs581610  | rs7523266 | rs9908886 |
| rs12214131 | rs16963956 | rs2015245 | rs320168  | rs581738  | rs7524151 | rs9909288 |
| rs12215007 | rs16964061 | rs2015608 | rs3209896 | rs582356  | rs7524291 | rs9911012 |
| rs12218054 | rs16964589 | rs201574  | rs3213097 | rs582883  | rs7524754 | rs9911112 |
| rs12218061 | rs16964620 | rs2018551 | rs3213493 | rs582937  | rs7526268 | rs9912445 |
| rs12223708 | rs16965679 | rs201873  | rs3213515 | rs583647  | rs7527017 | rs9913349 |
| rs12228176 | rs16965869 | rs2020095 | rs3213614 | rs584105  | rs752796  | rs991685  |
| rs1222926  | rs16966448 | rs2022566 | rs321471  | rs584444  | rs7528369 | rs991772  |
| rs12233463 | rs16967572 | rs2022696 | rs322535  | rs585106  | rs752880  | rs9921511 |
| rs12234278 | rs16967665 | rs2022919 | rs322691  | rs585416  | rs752925  | rs9922040 |
| rs12235141 | rs16967668 | rs2022990 | rs322695  | rs585967  | rs7529675 | rs9922112 |
| rs1223521  | rs16967749 | rs2024364 | rs322700  | rs586716  | rs752970  | rs9923225 |
| rs1223782  | rs16968024 | rs2024669 | rs323119  | rs587409  | rs7530656 | rs9923960 |
| rs12240404 | rs16968710 | rs2025074 | rs324499  | rs587493  | rs7533589 | rs9925600 |
| rs12240939 | rs16969836 | rs2025984 | rs325041  | rs588052  | rs7534290 | rs992692  |
| rs12245064 | rs16970006 | rs2026160 | rs327491  | rs588739  | rs7534709 | rs992742  |
| rs1225006  | rs16970900 | rs2027158 | rs328125  | rs590506  | rs7539177 | rs9928761 |
| rs12251142 | rs16971341 | rs2027260 | rs328636  | rs590658  | rs7539855 | rs9928764 |
| rs12252548 | rs16971371 | rs2027342 | rs329483  | rs590694  | rs754120  | rs992907  |
| rs12253993 | rs16972214 | rs2027581 | rs329497  | rs5907493 | rs754185  | rs992970  |
| rs12256790 | rs1697229  | rs2028285 | rs330336  | rs5908052 | rs7543408 | rs9930312 |
| rs12256835 | rs16972293 | rs2028455 | rs330344  | rs5908663 | rs7543669 | rs993071  |
| rs12259244 | rs16972316 | rs2028548 | rs330346  | rs5909721 | rs7544640 | rs9931155 |
| rs12262149 | rs16972495 | rs2028574 | rs331432  | rs590991  | rs7545328 | rs9931937 |
| rs12266741 | rs16972780 | rs2029668 | rs331713  | rs591505  | rs7547017 | rs9935426 |
| rs1227468  | rs16974494 | rs2031293 | rs331717  | rs5916197 | rs7548280 | rs9937572 |
| rs12277563 | rs16975515 | rs2031446 | rs331762  | rs5917010 | rs7549306 | rs9937815 |
| rs1227780  | rs16975546 | rs203180  | rs332093  | rs5917244 | rs7549759 | rs9938653 |
| rs1227940  | rs16975754 | rs2032814 | rs332416  | rs5917270 | rs7550775 | rs9939482 |
| rs12281140 | rs16976432 | rs2033766 | rs33295   | rs5917447 | rs755102  | rs994086  |
| rs1228412  | rs16976552 | rs2033790 | rs333132  | rs5918075 | rs7551258 | rs9941016 |
| rs12286813 | rs16976677 | rs2034007 | rs336956  | rs5919796 | rs7551367 | rs9942141 |
| rs12288920 | rs16976704 | rs2035344 | rs337853  | rs5922131 | rs7552203 | rs9943004 |
| rs1228970  | rs16976713 | rs2035631 | rs337888  | rs5923694 | rs755341  | rs9944033 |
| rs1230366  | rs16976826 | rs2035827 | rs339621  | rs5924210 | rs7555668 | rs9944095 |
| rs1230890  | rs169772   | rs2036376 | rs340295  | rs5924261 | rs7556373 | rs9945014 |
| rs12315055 | rs16977474 | rs2036980 | rs341402  | rs5926344 | rs7557129 | rs9945966 |
| rs12339003 | rs16979231 | rs2037432 | rs342003  | rs5928239 | rs7557216 | rs9946212 |
| rs12346949 | rs16980181 | rs2038037 | rs342367  | rs5928917 | rs7558568 | rs9947964 |
| rs12348218 | rs16980994 | rs2038459 | rs342411  | rs5929429 | rs7559055 | rs9948641 |
| rs12348343 | rs16982419 | rs2038741 | rs342781  | rs5930970 | rs7559591 | rs994882  |
| rs12355524 | rs16985429 | rs2039683 | rs34336   | rs593234  | rs7560058 | rs9951714 |
| rs12356013 | rs16986104 | rs2039970 | rs344652  | rs5933451 | rs7560205 | rs9952863 |
| rs12356300 | rs16986159 | rs2041046 | rs345243  | rs5933667 | rs7560223 | rs9953900 |
| rs12364347 | rs16986854 | rs2041405 | rs345299  | rs5933828 | rs7560400 | rs9954336 |
| rs12365770 | rs16987683 | rs2041509 | rs346400  | rs5934506 | rs7561070 | rs9954576 |
| rs12365975 | rs16989193 | rs2042049 | rs346854  | rs5937191 | rs7561149 | rs9957202 |
| rs12367619 | rs16991008 | rs2042078 | rs347344  | rs5939244 | rs7561273 | rs9959638 |
| rs12367859 | rs16991184 | rs2042161 | rs34736   | rs5943447 | rs7562462 | rs9960133 |
| rs12372849 | rs16992214 | rs204262  | rs347740  | rs5943619 | rs7563766 | rs996100  |
| rs1237521  | rs16993305 | rs2042970 | rs34878   | rs5949343 | rs7564112 | rs996211  |
| rs12376143 | rs16993306 | rs2043016 | rs34880   | rs5950482 | rs7564572 | rs9962573 |
| rs12376699 | rs16994188 | rs2043083 | rs34889   | rs5951564 | rs7565670 | rs9962601 |
| rs12378276 | rs16996551 | rs2043219 | rs34890   | rs5951565 | rs7565862 | rs9962867 |
| rs12380418 | rs16997566 | rs2043394 | rs349765  | rs595413  | rs7565903 | rs9963818 |
| rs12387895 | rs16997601 | rs2043657 | rs350301  | rs5955030 | rs756601  | rs9965575 |



|            |            |           |          |           |           |           |
|------------|------------|-----------|----------|-----------|-----------|-----------|
| rs12394920 | rs16998074 | rs2044102 | rs350450 | rs595739  | rs7566892 | rs996570  |
| rs12407211 | rs16998181 | rs2044756 | rs350993 | rs5958516 | rs7567576 | rs9969033 |
| rs12408030 | rs16998733 | rs2045160 | rs351181 | rs595883  | rs756763  | rs9969661 |
| rs12408340 | rs17001272 | rs2045709 | rs351824 | rs595983  | rs7569362 | rs9973445 |
| rs12408758 | rs17004063 | rs2046015 | rs352140 | rs5961389 | rs7569399 | rs997775  |
| rs12411742 | rs17005485 | rs2046046 | rs352143 | rs596362  | rs7570229 | rs9987243 |
| rs12417060 | rs17006215 | rs2046105 | rs352169 | rs5966456 | rs7570749 | rs999231  |
| rs12419392 | rs17007502 | rs2046262 | rs352199 | rs5966759 | rs7571132 | rs9993627 |
| rs12424875 | rs17007804 | rs2046323 | rs352358 | rs5967336 | rs7571301 | rs9998941 |
| rs12425296 | rs17007811 | rs2046822 | rs352428 | rs5968480 | rs7571424 | rs9999241 |
| rs1242558  | rs17008004 |           |          |           |           |           |
