# Supplementary material
Source: PubMed Central journal article supplement (PMC2864289)
Supplement: djq057_5.pdf [file djq057_5.pdf]

Supplementary Table 3. Survival characteristics of 15 studies in the validation data set\*

| Study        | No. of person-years at risk | Median time at risk, y (range) | Median follow-up time, y (range) | Median entry time†, y (range) | No. of deaths | Annual mortality rate |
|--------------|-----------------------------|--------------------------------|----------------------------------|-------------------------------|---------------|-----------------------|
| BBCC         | 5,046.53                    | 4.56 (0.02-15.00)              | 5.55 (0.69-15.00)                | 1.02 (0.00-14.75)             | 179           | 0.035                 |
| CGPS         | 6,016.34                    | 3.17 (0.003-5.61)              | 3.34 (0.003-15.00)               | 0.00 (0.00-14.89)             | 275           | 0.046                 |
| CNIO-BCS     | 652.89                      | 3.33 (0.01-4.54)               | 5.79 (1.33-15.00)                | 2.51 (0.00-12.59)             | 8             | 0.012                 |
| GESBC        | 2,399.22                    | 4.59 (0.01-7.65)               | 5.21 (0.24-7.72)                 | 0.20 (0.00-6.43)              | 95            | 0.040                 |
| HEBCS        | 12,686.52                   | 5.04 (0.03-15.00)              | 5.67 (0.08-15.00)                | 0.00 (0.00-13.69)             | 386           | 0.030                 |
| KARBAC       | 2,894.42                    | 6.41 (0.41-8.41)               | 6.41 (0.41-8.41)                 | 0.00 (0.00-0.00)              | 89            | 0.031                 |
| KBCP         | 4,123.14                    | 9.98 (0.08-15.00)              | 9.98 (0.08-15.00)                | 0.00 (0.00-0.00)              | 207           | 0.050                 |
| kConFab/AOCS | 904.40                      | 3.29 (0.01-9.51)               | 8.20 (0.22-15.00)                | 3.85 (0.00-14.91)             | 22            | 0.024                 |
| MCBCS        | 2,596.05                    | 2.38 (0.01-6.98)               | 2.47 (0.02-6.98)                 | 0.08 (0.00-2.59)              | 46            | 0.018                 |
| MCCS         | 4,854.98                    | 7.08 (0.13-15.00)              | 7.08 (0.13-15.00)                | 0.00 (0.00-0.00)              | 75            | 0.015                 |
| ORIGO        | 2,969.05                    | 6.52 (0.19-10.36)              | 7.22 (0.36-11.75)                | 0.34 (0.00-4.59)              | 117           | 0.039                 |
| PBCS         | 7,943.03                    | 4.71 (0.07-7.69)               | 4.96 (0.15-7.72)                 | 0.16 (0.00-3.54)              | 257           | 0.032                 |
| SASBAC       | 5,350.06                    | 4.79 (0.03-7.16)               | 9.35 (4.00-10.60)                | 4.82 (3.27-6.55)              | 148           | 0.028                 |
| SBCS         | 1,826.47                    | 2.76 (0.09-5.42)               | 5.29 (0.72-15.00)                | 2.14 (0.00-14.97)             | 91            | 0.050                 |
| UCIBCS       | 9,756.52                    | 10.45 (0.03-13.48)             | 11.78 (0.29-13.80)               | 1.18 (0.29-10.8)              | 308           | 0.032                 |
| <b>TOTAL</b> | <b>70,019.63</b>            | <b>4.61 (0.003-15.00)</b>      | <b>5.29 (0.003-15.00)</b>        | <b>0.11 (0.00-14.97)</b>      | <b>2,303</b>  | <b>0.033</b>          |

\* BBCC = Bavarian Breast Cancer Cases and Controls; CGPS = Copenhagen Breast Cancer Study and General Population Study; CNIO-BCS = Spanish National Cancer Centre Breast Cancer Study; GESBC = Genetic Epidemiology Study of Breast Cancer by Age 50; HEBCS = Helinski Breast Cancer Study; KARBAC = Karolinska Breast Cancer Study; KBCP = Kuopio Breast Cancer Project; kConFab/AOCS = Kathleen Cunningham Foundation Consortium for Familial Breast Cancer (kConFab) and Australian Ovarian Cancer Study (AOCS); MCBCS = Mayo Clinic Breast Cancer Study; MCCS = Melbourne Collaborative Cohort Study; ORIGO = Leiden University Medical Centre Breast Cancer Study; PBCS = National Cancer Institute Polish Breast Cancer Study; SASBAC = Singapore and Sweden Breast Cancer Study; SBCS = Sheffield Breast Cancer Study; UCIBCS = University of California at Irvine Breast Cancer Study.

†Median entry time refers to the median value of time to enrollment, in years, for each study.
