# Supplementary material
Source: PubMed Central journal article supplement (PMC2864289)
Supplement: djq057_7.pdf [file djq057_7.pdf]

Supplementary Table 5. Associations between single-nucleotide polymorphism (SNP) rs6626269 or rs4778137 and overall survival in the validation data set: study-specific unadjusted analyses\*

| Study        | rs6626269           |                    | rs4778137           |                    | rs4778137 (ER negative) |                    | rs4778137 (ER positive) |                    |
|--------------|---------------------|--------------------|---------------------|--------------------|-------------------------|--------------------|-------------------------|--------------------|
|              | HR (95% CI)         | $P_{\text{trend}}$ | HR (95% CI)         | $P_{\text{trend}}$ | HR (95% CI)             | $P_{\text{trend}}$ | HR (95% CI)             | $P_{\text{trend}}$ |
| BBCC         | N/A†                |                    | 1.11 (0.88 to 1.39) | .39                | 0.89 (0.57 to 1.40)     | .61                | 1.25 (0.91 to 1.74)     | .17                |
| CGPS         | 0.92 (0.75 to 1.14) | .46                | 0.94 (0.78 to 1.13) | .52                | 0.77 (0.53 to 1.13)     | .19                | 0.97 (0.76 to 1.24)     | .80                |
| CNIO-BCS     | 1.08 (0.31 to 3.74) | .90                | 1.19 (0.43 to 3.32) | .74                | 3.01 (0.29 to 30.70)    | .35                | 1.79 (0.33 to 9.85)     | .50                |
| GESBC        | N/A†                |                    | 0.96 (0.71 to 1.31) | .81                | 0.92 (0.58 to 1.47)     | .72                | 0.80 (0.48 to 1.33)     | .40                |
| HEBCS        | 1.09 (0.92 to 1.29) | .32                | 1.05 (0.88 to 1.26) | .60                | 0.89 (0.63 to 1.25)     | .51                | 1.10 (0.88 to 1.37)     | .41                |
| KARBAC       | 0.82 (0.55 to 1.20) | .31                | 0.92 (0.65 to 1.30) | .64                | 0.96 (0.49 to 1.86)     | .90                | 0.89 (0.58 to 1.35)     | .57                |
| KBCP         | 1.07 (0.85 to 1.35) | .58                | 1.06 (0.82 to 1.37) | .64                | 0.61 (0.35 to 1.07)     | .09                | 1.17 (0.87 to 1.58)     | .29                |
| kConFab/AOCS | 1.44 (0.78 to 2.67) | .24                | 0.93 (0.50 to 1.72) | .82                | 1.89 (0.35 to 10.16)    | .46                | 0.86 (0.35 to 2.13)     | .74                |
| MCBCS        | 0.91 (0.54 to 1.54) | .72                | 0.89 (0.55 to 1.46) | .65                | 1.24 (0.56 to 2.74)     | .59                | 0.63 (0.32 to 1.25)     | .18                |
| MCCS         | 1.17 (0.80 to 1.70) | .41                | 0.83 (0.57 to 1.19) | .30                | 0.39 (0.18 to 0.86)     | .02                | 1.22 (0.79 to 1.90)     | .37                |
| ORIGO        | 1.25 (0.92 to 1.69) | .15                | 0.84 (0.62 to 1.13) | .24                | 1.11 (0.65 to 1.88)     | .71                | 0.69 (0.43 to 1.10)     | .12                |
| PBCS         | 1.00 (0.80 to 1.26) | .97                | 0.98 (0.81 to 1.20) | .88                | 0.93 (0.75 to 1.16)     | .55                | 0.96 (0.76 to 1.20)     | .53                |
| SASBAC       | 0.91 (0.68 to 1.21) | .52                | 0.79 (0.60 to 1.04) | .10                | 1.03 (0.50 to 2.10)     | .94                | 0.70 (0.49 to 1.00)     | .05                |
| SBCS         | 0.80 (0.54 to 1.20) | .28                | 0.98 (0.70 to 1.37) | .90                | 0.98 (0.51 to 1.88)     | .94                | 1.10 (0.63 to 1.90)     | .75                |
| UCIBCS       | N/A‡                |                    | 1.04 (0.88 to 1.23) | .65                | 0.74 (0.50 to 1.10)     | .13                | 1.10 (0.88 to 1.38)     | .41                |

\* Statistical significance based on one degree of freedom trend test. All statistical tests were two-sided. HR = hazard ratio; CI = confidence interval; ER = estrogen receptor; BBCC = Bavarian Breast Cancer Cases and Controls; CGPS = Copenhagen Breast Cancer Study and General Population Study; CNIO-BCS = Spanish National Cancer Centre Breast Cancer Study; GESBC = Genetic Epidemiology Study of Breast Cancer by Age 50; HEBCS = Helinski Breast Cancer Study; KARBAC = Karolinska Breast Cancer Study; KBCP = Kuopio Breast Cancer Project; kConFab/AOCS = Kathleen Cuninghame Foundation Consortium for Familial Breast Cancer (kConFab) and Australian Ovarian Cancer Study (AOCS); MCBCS = Mayo Clinic Breast Cancer Study; MCCS = Melbourne Collaborative Cohort Study; ORIGO = Leiden University Medical Centre Breast Cancer Study; PBCS = National Cancer Institute Polish Breast Cancer Study; SASBAC = Singapore and Sweden Breast Cancer Study; SBCS = Sheffield Breast Cancer Study; UCIBCS = University of California at Irvine Breast Cancer Study

† SNP assay failed quality control requirements.

‡ Failed SNP assay.
